**Running title:** Constitutive current by GABA<sub>A</sub> receptors

## **Kinase activity simultaneously determines the constitutive and the orthosteric gating in $\alpha_4\beta_{1/3}\delta$ GABA<sub>A</sub> receptors in hippocampal granule cells**

Authors:

Nils Ole Dalby\*\*, Ulrike Leurs, Christina Birkedahl Falk-Petersen, Petra Scholze<sup>1</sup> Jacob Krall, Bente Frølund, Petrine Wellendorph\*

Affiliations:

Department of Drug Design and Pharmacology, Faculty of Health and Medical Sciences, University of Copenhagen, Universitetsparken 2, DK-2100 Copenhagen, Denmark.

<sup>1</sup> Medical University of Vienna, Center for Brain Research, Department of Pathobiology of the Nervous System, Spitalgasse 4, A-1090 Vienna, Austria.

\*\*Corresponding and submitting author:

Nils Ole Dalby, Department of Drug Design and Pharmacology, Faculty of Health and Medical Sciences, University of Copenhagen, Universitetsparken 2, DK-2100 Copenhagen, Denmark, Phone: (+45) 2285 9920, E-mail: nilbys@gmail.com

\*Corresponding author

Petrine Wellendorph, Department of Drug Design and Pharmacology, Faculty of Health and Medical Sciences, University of Copenhagen, Universitetsparken 2, DK-2100 Copenhagen, Denmark, Phone: (+45) 3533 6397, E-mail: pw@sund.ku.dk

41 pages

6 figures, 1 table, 1 extended data set

Number of words: 235 (Abstract), 625 (Introduction), 1500 (Discussion)

### **Acknowledgments**

The authors would like to thank Dr. Javier Martín from the Transgenic Core Facility at the University of Copenhagen for excellent technical assistance with generating the  $\beta_1$  KO strain. Further, we are thankful to Dr. Delia Belelli for fruitful discussions and for the generous gift of the  $\delta$  mouse strain. Dr. Anders Klein is kindly acknowledged for help with animal work. This work was supported by funding from the Lundbeck Foundation (grants R133-A12270 to P.W., R192-2015-666 to U.L. and R230-2016-2562 to C.B.F.-P).

The authors declare no competing financial interests.

**Running title:** Constitutive current by GABA<sub>A</sub> receptors

1 **Abstract**

2 A subset of the GABA<sub>A</sub> receptors expressed in recombinant systems and neurons is known to exhibit both  
3 constitutive- and agonist-induced gating. Two such receptors are the  $\delta$ -subunit containing GABA<sub>A</sub> receptors  
4  $\alpha_4\beta_1\delta$  and  $\alpha_4\beta_3\delta$ , which are expressed in adult rodent hippocampal dentate gyrus granule cells (DGGCs).  
5 Here we show that the GABA<sub>A</sub> receptor mediated tonic current recorded in the presence of tetrodotoxin in  
6 adult rodent DGGCs is almost exclusively mediated by constitutively active  $\delta$ -subunit containing GABA<sub>A</sub>  
7 receptors and that the constitutive current is absent in recordings at 24 °C or in recordings at 34 °C including  
8 an intracellular inhibitor of protein kinase C. These factors simultaneously govern the efficacy of an  
9 orthosteric agonist at  $\alpha_4\beta_{1/3}\delta$  receptors, Thio-THIP, in a reciprocal manner. In the absence of constitutive  
10 receptor activity, the efficacy of Thio-THIP was increased approximately four-fold relative to recording  
11 conditions that favors constitutive activity. Further, only under conditions of an absent constitutive current,  
12 the classified neutral antagonist gabazine (GBZ) alone, induced a tonic current in DGGCs (EC<sub>50</sub> 2.1  $\mu$ M).  
13 This effect of GBZ was not seen in recording conditions of high constitutive activity, was inhibited by  
14 picrotoxin (PTX), potentiated by DS2, completely absent in  $\delta^{-/-}$  mice and reduced in  $\beta_1^{-/-}$  mice, but could not  
15 be replicated in human  $\alpha_4\beta_{1/3}\delta$  receptors expressed recombinantly in HEK cells. We hypothesize that specific  
16 intracellular components in neurons interact with receptors to determine constitutive gating and receptor  
17 responsiveness to orthosteric ligands.

**Running title:** Constitutive current by GABA<sub>A</sub> receptors

1 **Significance statement**

2 The presented data highlight how recording conditions for whole cell patch clamp analysis of  $\alpha_4\beta_{1/3}\delta$  GABA<sub>A</sub>  
3 receptors can mask important pharmacological effects. Specifically, orthosteric agonists appear with reduced  
4 efficacy, and other ligands, here exemplified with the well-known antagonist GBZ, are misinterpreted as  
5 being inactive/neutral, although they could have effect in constitutively silent receptors. Unmasking of  
6 potential hidden effects are easily done using recording conditions of reduced kinase activity in a relevant  
7 neuronal context. It follows that in pathologies with changes in phosphorylation level of  $\delta$ -subunit containing  
8 GABA<sub>A</sub> receptors, the efficacy of an agonist of these receptors, measured by whole-cell recordings *in vitro*,  
9 will not match the efficacy of the same agonist in an unperturbed neuron *in vivo*.

10

**Running title:** Constitutive current by GABA<sub>A</sub> receptors

1 **Introduction**

2 GABA<sub>A</sub> receptors belong to the Cys-loop superfamily of ion channels. The functional channel that comprises  
3 the orthosteric binding site for GABA is a pentamer composed of two  $\alpha$ , two  $\beta$  and one  $\gamma$  or  $\delta$  subunit. Sampled  
4 from a population of six  $\alpha$  (1-6), three  $\beta$  (1-3), two  $\gamma$  (1-2) and one  $\delta$ , the possible number of permutations is  
5 in the hundreds. However, the existence of assembly rules favoring distinct combinations allow for only a  
6 subset to exist *in vivo* (Olsen and Sieghart, 2008; Martenson et al., 2017). The anatomical localization is, with  
7 a few exceptions, subunit-specific and typically the  $\gamma$ -subunit containing receptors mediates a synaptic, fast  
8 inhibitory post-synaptic current (IPSC), and the  $\delta$ - and the  $\alpha_{4-6}$ -subunit containing receptors mediate a slow  
9 extrasynaptic tonic current (Farrant and Nusser, 2005; Chandra et al., 2006). The magnitude of the tonic current  
10 is region and neuron-specific, and the general view is that synaptic overspill, including release from  
11 neurogliaform interneurons, is the main determinant of GABA in the cerebrospinal fluid (CSF) and of the tonic  
12 current (reviewed by (Glykys and Mody, 2007; Lee and Maguire, 2014; Overstreet-Wadiche and McBain,  
13 2015). However, several GABA<sub>A</sub> receptor subtypes in recombinant systems, cultured hippocampal neurons  
14 and acute slices also display a degree of constitutive activity (Birnir et al., 2000; McCartney et al., 2007; Tang  
15 et al., 2010; Othman et al., 2012; Wlodarczyk et al., 2013; Hoestgaard-Jensen et al., 2014). For example, the  
16 receptor subunit combinations  $\alpha_{1/4}\beta_3\gamma_{2(L)}$  and  $\alpha_4\beta_{1/3}\delta$  are capable of both GABA-activated and constitutive  
17 gating, the latter ( $\alpha_4\beta_3\delta$ ) in a manner dependent on protein kinase A (PKA) activity (McCartney et al., 2007;  
18 Tang et al., 2010; Jensen et al., 2013; Hoestgaard-Jensen et al., 2014). Further, there is evidence to suggest  
19 that, while constitutively active, receptor populations of the  $\alpha_4\beta_3\delta$  subtype in recombinant systems  
20 simultaneously display reduced efficacy to low levels of GABA, either by imposing a limitation on the  
21 dynamic range for orthosteric agonism or/and by desensitization (Tang et al., 2010; Jensen et al., 2013). The  
22 hippocampal dentate gyrus granule cells (DGGCs) in adult rats and mice exhibit near the highest level of co-  
23 expressed  $\alpha_4$ ,  $\beta_{1/3}$  and  $\delta$  subunits seen in the brain (Sperk et al., 1997), suggesting that  $\alpha_4\beta_{1/3}\delta$  GABA<sub>A</sub> receptors  
24 are very probable inhabitants at peri- and extra-synaptic loci in DGGCs (Wei et al., 2003; Chandra et al., 2006;  
25 Zhang et al., 2007; Herd et al., 2008). However, the effect of a selective agonist at  $\alpha_4\beta_{1/3}\delta$  receptors suggested,  
26 paradoxically, a very limited expression of these receptors in DGGCs, and mainly at synaptic loci (Hoestgaard-

**Running title:** Constitutive current by GABA<sub>A</sub> receptors

1 Jensen et al., 2014). To examine this problem in detail, the present study was concerned with the role of protein  
2 kinase activity on the constitutive current, and further, the relation between constitutive and agonist-mediated  
3 gating in DGGCs. Initially we show that the endogenous tonic current recorded in adult rodent DGGCs is  
4 predominantly due to constitutive gating and that this channel behavior is determined by recording  
5 temperature, intracellular calcium, and by the activity of protein kinase C (PKC). By minimizing the  
6 constitutive activity with kinase inhibition, we find that an inverse relation exists between the magnitudes of  
7 constitutively active *versus* agonist-induced gating by a subset of  $\delta$ -subunit containing GABA<sub>A</sub> receptors in  
8 DGGCs. This ability to minimize the constitutive gating by intracellular inhibition of kinase activity has also  
9 provided new understanding on the effects of the two different GABA<sub>A</sub> receptor antagonists bicuculline (BIC)  
10 and gabazine (GBZ), because GBZ is assumed to be inactive towards constitutively active receptors (Bai et  
11 al., 2001; McCartney et al., 2007; Włodarczyk et al., 2013). However, under conditions of no apparent  
12 constitutive current, we find that GBZ introduces a current in a population of  $\delta$ -subunit containing GABA<sub>A</sub>  
13 receptors in DGGCs, which is reminiscent of the constitutive current, and accordingly, GBZ is not a neutral  
14 antagonist.

15

**Running title:** Constitutive current by GABA<sub>A</sub> receptors

1 **Materials and Methods**

2 *Chemical compounds*

3 4,5,6,7-Tetrahydroisoxazolo[5,4-*c*]pyridin-3-ol (THIP) and 4,5,6,7-tetrahydroisothiazolo[5,4-*c*]pyridin-3-ol  
4 (Thio-THIP) were synthesized at the Department of Drug Design and Pharmacology, University of  
5 Copenhagen as previously described (Krehan et al., 2003). CGP54626, TTX, SR95531 (gabazine; GBZ),  
6 TPMPA, MLA, PKC autoinhibitory peptide (19-36), (4-chloro-[2-(2-thienyl)imidazo[1,2*a*]pyridine-3-  
7 yl]benzamide (DS2) and GABA were obtained from Tocris Bioscience (Bristol, UK) and kynurenate,  
8 strychnine, atropine, picrotoxin (PTX) and bicuculline-methiodide (BIC) were obtained from Sigma-Aldrich  
9 (St. Louis, MO, USA).

10

11 *Animal work*

12 Adult male rats were obtained from Envigo and housed in cages holding up to six rats with *ad libitum* access  
13 to food and water in rooms maintained at 22-24 °C, 55% humidity at a 12 h/12 h normal night/day cycle.

14 Similar housing conditions were used for mice. All animal experiments were carried out in accordance with  
15 the European Communities Council Directive (86/609/EEC) for the care and use of laboratory animals and  
16 the Danish legislation regulating animal experiments.

17 For mouse studies,  $\delta$  and  $\beta_1$  GABA<sub>A</sub> receptor subunit null (germline) mutants were employed. A breeding  
18 pair of mice heterozygous for the  $\delta$  deletion (Mihalek et al., 1999) of the strain C57BL/6J  $\times$  129Sv/SvJ was  
19 kindly provided by Dr. Delia Belelli, University of Dundee, Scotland and bred in-house. Mice carrying  
20 deletions in the  $\beta_1$  gene were generated and bred in-house as described below. All mice were bred at the  
21 specific pathogen-free animal facility at the University of Copenhagen. For both  $\delta$  and  $\beta_1$  deleted strains,  
22 heterozygotes were intercrossed to create littermates of all three genotypes ( $^{-/-}$ ,  $^{+/+}$ , and  $^{+/-}$ ) and monitored by  
23 PCR genotyping. Only  $^{-/-}$  and  $^{+/+}$  male mice resulting from heterozygous breeding were used for the studies.

24

25

**Running title:** Constitutive current by GABA<sub>A</sub> receptors

1 *Production of  $\beta_1^{-/-}$  mice*

2 For the generation of mice with a targeted deletion of *gabrb1*, a Knockout First promoter driven mouse  
3 *Gabrb1tm1a(KOMP)Wtsi* was purchased from the KOMP repository ([www.komp.org](http://www.komp.org)) and used to generate  
4 a full germline knockout ( $\beta_1^{-/-}$ ). To this end, the obtained mouse was first crossed with a global Flp-  
5 expressing mouse to generate a conditional *loxP*-flanked (floxed) allele. Secondly, this mouse was crossed  
6 with a global Cre-expressing mouse to generate mice with a constitutive knockout allele,  $\beta_1^{+/-Cre+}$ . These were  
7 back-crossed into the C57BL/6 background to remove the *Cre* and *Flp* and to produce a genetically pure  
8 offspring and carefully monitored by PCR analysis. The resulting mouse lacks exon 4 of the *gabrb1* gene  
9 and instead contains one *frr* and one *loxP* site. After several steps of backcrossing to the C57BL/6J  
10 background strain, the generation equivalent level was determined by speed congenics using SNP analysis  
11 technology (1450 SNP marker panel) (Taconic, Lille Skensved, Denmark). Of seven out of seven tested  
12 heterozygous males, all were found to be at least 99.72% identical to the C57BL/6J background, thus at least  
13 equivalent to the N8 generation. In general, the mice lacking either one or both deleted alleles ( $\beta_1^{+/-}$  or  $\beta_1^{-/-}$ )  
14 were viable and born at expected Mendelian ratios. The mice were normal in their development, fertile, and  
15 did not exhibit obvious behavioral or physical phenotypes. Animals were genotyped using the REDExtract-  
16 N-Amp™ Tissue PCR Kit (Sigma Aldrich) according to the manufacturer's instructions. Primers were  
17 designed to discriminate knockout and wildtype  $\beta_1$  alleles (forward primer 5'-  
18 GTATGGTCAGATGTCCTCAC-3' and reverse primer 5'-CTGTCTTGCTAGCTTTGAG-3'). The  
19 amplification was as follows (94 °C 5 min initial; then 94 °C 30 sec, annealing at 57 °C for 30 sec, extension  
20 at 72 °C for 1.5 min for 35 cycles) to generate fragments of 1211 bp for wildtype allele and 572 bp for the  
21 knockout allele.

22  
23 *Slice electrophysiology*

24 Slices of rat brain were obtained from young adult male Sprague Dawley rats weighing 230-300 g at the time  
25 of experiment. Mice were 2-4 months old at the time of experiment. At the day of experiment, a single rat or  
26 mouse was decapitated and the head immediately immersed in ice-cold artificial CSF (ACSF, composition

**Running title:** Constitutive current by GABA<sub>A</sub> receptors

1 below) for 6-8 min before dissection of the brain. For dissection and slicing of the brain, ACSF contained (in  
2 mM): N-Methyl D-Glucamine (NMDG, 100), NaCl (26), KCl (2.5), CaCl<sub>2</sub> (1), MgCl<sub>2</sub> (3), NaHCO<sub>3</sub> (26),  
3 NaH<sub>2</sub>PO<sub>4</sub> (1.25), D-glucose (10), ascorbate (0.3), pyruvic acid (0.3), kynurenic acid (1), adjusted to 305± 3  
4 mOsm and aerated with carbogen (95 % O<sub>2</sub>/5 % CO<sub>2</sub>). The brain was glued to the base of a Leica VT1200 S  
5 vibratome and cut in 350 μm thick horizontal sections. Slices were stored at 28-29 °C in a carbogenated  
6 ACSF of composition as above but without kynurenate and NMDG replaced with equimolar NaCl. Whole  
7 cell patch clamp recordings of individual neurons in slices began after a 90 min recovery period, and slices  
8 were used up to 4 h thereafter. Recording ACSF were in composition of bulk chemicals similar to storage  
9 ACSF, but carried in addition: kynurenate (1 mM), CGP54626 (1 μM), atropine (1 μM), strychnine (1 μM)  
10 and TTX (0.5 μM). For electrically evoked IPSCs, TTX was omitted and a Ca<sup>2+</sup>/Mg<sup>2+</sup> ratio of 2/2 was used.  
11 During recordings, slices were maintained in a chamber holding 2 ml of ACSF at a flow rate of 2.8 – 3.0  
12 ml/min at a temperature of 23-24 or 33-34 °C. We used four different conditions for recording of the  
13 pharmacological effects of drugs efficacious at neuronal GABA<sub>A</sub> receptors, which we refer to as condition **a**,  
14 **b**, **c** and **d**. For condition **a**, recordings were made at 23-24 °C using an intracellular solution (ICS) composed  
15 of (in mM): CsCl (135), NaCl (4), MgCl<sub>2</sub> (2), N-2-hydroxyethylpiperazine-N'-2-ethanesulphonic acid  
16 (HEPES) (10), EGTA (0.05), QX-314 (5), tetraethylammoniumchloride (TEA, 5), Mg-ATP (2), Na<sub>2</sub>-GTP  
17 (0.5). The pH of the ICS was adjusted to 7.2 with CsOH and held an osmolarity of 290-295 mOsm. For  
18 condition **b**, recordings were made at 33-34 °C using the same ICS. For condition **c**, recordings were made at  
19 33-34 °C, using the same ICS but including 10 μM of the auto-inhibitory fragment (19-36) of PKC. For these  
20 experiments, an aliquot of the kinase inhibitor peptide was added to a prefiltered (0.22 μm) vial of ICS  
21 before use. Condition **d** was performed also at 33-34 °C, using ICS of similar composition as in condition **b**,  
22 but in which the concentration of EGTA was increased from 0.05 to 10 mM and CsCl accordingly decreased  
23 to maintain osmolarity. Individual neurons were visualized in an IR video-microscope and recorded using  
24 thin-walled borosilicate pipettes (Sutter, OD/ID 1.5/1.1 mm) with a 6-8 MΩ resistance (condition **a-d**). To  
25 ensure a good diffusion of the ICS into the neuron, we used an 8-9 min period between establishing the  
26 whole-cell configuration and beginning recording of baseline activity. Recordings of phasic and tonic  
27 currents consisted of a 3 min baseline period, followed by a 6 min drug period (Thio-THIP, THIP and GBZ)



**Running title:** Constitutive current by GABA<sub>A</sub> receptors

1 and 3-5 min of BIC, GBZ or PTX. Cell capacitance (CP) and series resistance (RS) were measured every 3-4  
2 min throughout the recording and 80 % compensated for RS. Cells were excluded from analysis if values for  
3 CP and RS deviated more than 30 % from initial values determined at baseline. For evoked synaptic events,  
4 a constant current stimulus isolator (A365, WPI) was used to deliver a 0.5 ms rectangular current pulse via a  
5 bipolar theta glass electrode (Sutter, OD 1.5 mm), pulled to obtain 3-5 μm openings and filled with ACSF.  
6 Stimulation electrodes were positioned either proximal (maximum 20 μm from cell soma) or distal, in the  
7 outermost 20 μm of the molecular layer. Whole-cell recordings were made using a Multiclamp 700A patch  
8 clamp amplifier controlled by pClamp 9 software and digitized at 10 kHz with a digidata 1322 (all Molecular  
9 Devices) and filtered (8-pole Bessel) at 3 kHz.

10

11 *Analysis of patch clamp recordings in DGGCs*

12 The average holding current value was assessed as the center-value,  $x_c$ , of a single Gaussian fit of the  
13 general expression  $A * e^{-0.5 * \left(\frac{x-x_c}{w}\right)^2}$  to single-point trace-values in a two-min period (one-min for final  
14 antagonist) sampled at a 100 ms interval. The analysis-window for baseline- and drug-period ended  
15 immediately prior to beginning of bath perfusion of the ensuing drug. The tonic current density (TCD) was  
16 calculated as the difference in holding currents divided by the cell capacitance (pA/pF) and all TCD values  
17 are reported  $\pm$  SD. Thus, an increase in the GABA<sub>A</sub> receptor gating (e.g. by an agonist) results in a negative  
18 value for TCD. A positive value for TCD occurs when the current shuts. The noise was analyzed in some  
19 cases and was calculated as the center-value of a Gaussian fit to values of SD of 2 ms periods sampled at 100  
20 ms intervals. Tonic currents, noise analysis and evoked events were analyzed in Clampfit 9 and Origin  
21 (OriginLab, 2017). Spontaneous mIPSCs were analyzed in Synaptosoft (6.07) and Origin as previously  
22 detailed (Hoestgaard-Jensen et al., 2014). Synaptic events included in the average waveform were detected  
23 with a 6\*RMS threshold determined in the drug period to obviate false detections due to the increased noise  
24 during Thio-THIP application. The EC<sub>50</sub> value for GBZ effect on tonic current was determined as the

25 concentration of half-maximal effect ( $x_0$ ) in a fit to a logistic function of the general expression  $= \left( \frac{A1-A2}{1+\left(\frac{x}{x_0}\right)^p} \right)$ .

**Running title:** Constitutive current by GABA<sub>A</sub> receptors

1 *GABA<sub>A</sub> receptor expression and FLIPR<sup>TM</sup> membrane potential (FMP) Blue Assay on HEK-293 cells*  
2 The FMP assay was performed on HEK-293 Flp-In<sup>TM</sup> cells expressing the human  $\alpha_4\beta_1\delta$  and  $\alpha_4\beta_3\delta$  GABA<sub>A</sub>  
3 receptor as described previously (Falk-Petersen et al., 2017). In brief, HEK-293 Flp-In cells stably  
4 expressing the human GABA<sub>A</sub>  $\delta$ -subunit (HEK- $\delta$  cells) were transfected in a 1:1 ratio (4  $\mu$ g + 4  $\mu$ g) of  
5 human  $\alpha_4$  (pUNIV plasmid) and human  $\beta_1$  (pUNIV plasmid) and 2:0.01 ratio (8  $\mu$ g + 0.04  $\mu$ g) of  $\alpha_4$  to  
6 human  $\beta_3$  (pcDNA3.1) using Polyfect Transfection Reagent (Qiagen, West Sussex, UK). 16-24 hours after  
7 transfection, cells were plated into black poly-D-lysine coated clear bottom 96-well plates (BD Biosciences,  
8 Bedford, MA, USA) at 50,000 cells/well. After 16-20 hours, the media was aspirated, cells were washed and  
9 added 100  $\mu$ l/well of FMP blue dye (0.5 mg/ml) (Molecular Devices (Sunnyvale, CA, USA) followed by  
10 incubation for 30 min in a humidified 5% CO<sub>2</sub> incubator at 37 °C. Ligand solutions were prepared in assay  
11 buffer in 5x which for antagonist testing contained a concentration of GABA corresponding to GABA EC<sub>80</sub>.  
12 Ligands were added to a 96-well ligand plate and incubated for 15 min at the desired recording temperature  
13 (either 22 or 37 °C) in the NOVOstar<sup>TM</sup> plate reader (BMG, LABTECH GmbH, Offenburg, Germany). The  
14 plate was read using an emission wavelength of 560 nm caused by excitation at 530 nm with response  
15 detected as changes in fluorescent signal given in fluorescent units ( $\Delta$ FU). The obtained data is based on 2-3  
16 independent experiment each with three technical replicates. All potency determinations were based on at  
17 least three independent experiments. Data was analyzed as relative changes in the fluorescent signal by  
18 taking the maximum compound induced peak/plateau signal and subtracting the baseline signal. Changes in  
19 the fluorescent signal caused by ligand addition to the wells and artefacts were manually omitted for the  
20 analysis. Concentration-response curves were fitted using the four-parameter concentration-response curve:

21 
$$Response = bottom + \frac{top - bottom}{1 + 10^{((\log(EC_{50}) - [A]) \cdot n_H)}}$$

22 with bottom being the lower plateau response and top the upper. [A] is the logarithmic concentration of the  
23 compound and n<sub>H</sub> the hill slope. Antagonists were fitted using the same equation giving IC<sub>50</sub> instead of EC<sub>50</sub>  
24 as for the agonist.

25

**Running title:** Constitutive current by GABA<sub>A</sub> receptors

1 *Western blots*

2 After decapitation, the cortex and hippocampus were rapidly dissected, snap-frozen on dry ice and stored at -  
3 80 °C until use. Crude synaptically enriched membranes were prepared by quickly thawing the brain tissue at  
4 37 °C and adding 5x w/v of 50 mM Tris HCl, pH 7.4 supplemented with EDTA-free protease inhibitors  
5 (Roche). Tissue was homogenized using 2 x 1 mm zirkonium-oxide beads in the Bullet Blender (Next  
6 Advance, NY, USA) for 30 sec at max. speed. Protein concentration was determined using Bradford protein  
7 assay and 10 µg of each sample was loaded. Blots were probed with anti- $\alpha_1$ , anti- $\alpha_4$ , anti- $\beta_2$  (all a gift from  
8 Assoc. Prof. Dr. Petra Scholze, Medical University of Vienna, Center for Brain Research), anti- $\delta$  (#868A-  
9 GDN, Phosphosolutions, USA), anti- $\gamma_2$  (#NB300-190, Novus Biologicals, Littleton, USA), anti- $\beta_3$  (#NBP1-  
10 47613, Novus Biologicals), anti-GAPDH (# NB600-502, Novus Biologicals, Littleton, USA) and anti-  
11 Na<sup>+</sup>/K<sup>+</sup>-ATPase (#ab76020, Abcam, Cambridge, USA). The antibodies used are associated with the  
12 following IDs in the research resource identifier database (RRID, <https://scicrunch.org/resources>):  
13 AB\_2631037 (GABA<sub>A</sub> delta), AB\_2294344 (GABA<sub>A</sub> gamma2), AB\_10010570 (GABA<sub>A</sub> beta 3),  
14 AB\_10077682 (GAPDH) and AB\_1310695 (Na<sup>+</sup>/K<sup>+</sup>-ATPase). The GAPDH or Na<sup>+</sup>/K<sup>+</sup>-ATPase signal was  
15 used to normalize for loading differences. Primary antibodies were detected with HRP-conjugated goat anti-  
16 rabbit or -mouse antibody (#PI-1000 and #PI-2009, Vector Laboratories, USA) and visualized by  
17 chemiluminescence (Amersham ECL Prime). Protein levels were compared by densitometric measurement  
18 of band intensities and analyzed using Student's t-test in GraphPad Prism 7 (GraphPad Software, San Diego,  
19 CA, USA).

20

21 *Experimental design and statistical analysis*

22 Hypothesis testing was performed as described in the “Results” section using either one-way ANOVA with  
23 appropriate post-hoc test for multiple comparisons or t-tests for pair-wise comparisons, depending upon the  
24 experimental design as specified in the text. In connection with each experiment the statistical test employed  
25 along with the F value (when applicable), P value, standard error and number of experiments are stated. Data

**Running title:** Constitutive current by GABA<sub>A</sub> receptors

1 are generally stated as mean  $\pm$ SD except for mean potencies which are stated as pEC<sub>50</sub>/pIC<sub>50</sub>  $\pm$ SEM. For  
2 overview, number of experiments and significance levels are further provided in the figure legends.

3

4 **Results**

5 We set out to determine the magnitude of the constitutive and the agonist-induced tonic current in DGGCs  
6 under varying conditions of temperature, free intracellular Ca<sup>2+</sup> concentration and PKC activity. We found  
7 that the magnitude of the endogenous tonic current after blocking GABA<sub>A</sub> receptors with 20  $\mu$ M BIC  
8 differed significantly among conditions for the experiment (condition **a** through **d**, figure 1A, table 1).  
9 Specifically, the GABA<sub>A</sub> receptor-mediated tonic current density (TCD) measured using 20  $\mu$ M BIC in  
10 condition **a**, **c** and **d** was (mean pA/pF $\pm$ SD) 0.0 $\pm$ 0.2, 0.1 $\pm$ 0.4 and 0.1 $\pm$ 0.3, respectively, but 0.8 $\pm$ 0.2 in  
11 condition **b** (one-way ANOVA F=19.5 P=1.5E-8, Bonferroni for **b** vs **a**, **c** and **d** gave P<3E-6, P=1 for other  
12 combinations, n = 12-14 /condition, see table 1). We also assessed the BIC sensitive TCD in  $\delta^{-/-}$  mice by  
13 recordings made in condition **b** and **d** (figure 1C). In recording condition **b**, a TCD mean pA/pF $\pm$ SD of  
14 0.7 $\pm$ 0.3 was measured in  $\delta^{+/+}$  mice compared to 0.0 $\pm$ 0.4 in  $\delta^{-/-}$  mice (P<0.01, unpaired t-test, n= 9/10). In  
15 recording condition **d**, the BIC-induced TCD was 0.0 $\pm$ 0.4 in  $\delta^{+/+}$  and 0.1 $\pm$ 0.2 in  $\delta^{-/-}$  mice (ns, n=10/11),  
16 indicating that the receptors responsible for the Ca<sup>2+</sup>, PKC and BIC sensitive TCD are dependent on  
17 incorporation of the  $\delta$ -subunit. Because network levels of extracellular GABA were unlikely to be influenced  
18 by the composition of the ICS in a single neuron, it appears plausible that the TCD in condition **b** (figure 1A,  
19 B) is a result of predominantly constitutively active receptors, thus inferring BIC as an inverse agonist.

20 *Figure 1 near here*

21 To proceed, two cases were considered: If extracellular levels of GABA mediated the TCD in condition **b**,  
22 GABA<sub>A</sub> receptors could be internalized in conditions **a**, **c** and **d**, and thus not in the capacity to respond to  
23 the extracellular levels of GABA. If, on the other hand, the TCD in condition **b** was due to constitutive  
24 activity, then channels must be either shut or internalized in conditions **a**, **c** and **d**. In either case, the effect of  
25 bath-applied orthosteric agonists should reveal if the recording conditions had created a functional difference

**Running title:** Constitutive current by GABA<sub>A</sub> receptors

1 in the number of receptors available for activation. We therefore tested the  $\delta$ -subunit selective agonists Thio-  
2 THIP (100  $\mu$ M) and THIP (2  $\mu$ M) in condition **a** through **d** (figure 2). In order to compare with effects of  
3 GBZ (below), for these and the following experiments, we used PTX rather than BIC to block agonist-  
4 induced currents.

5 *Figure 2 near here*

6 These experiments revealed that the recording condition greatly influenced the magnitude of TCD induced  
7 by  $\delta$ -subunit selective agonists in DGGCs (figure 2A, C, F-H and table 1). For 100  $\mu$ M Thio-THIP recorded  
8 under conditions **a**, **c** and **d**, (figure 2A, C) the TCD was (mean pA/pF $\pm$ SD)  $-1.2\pm 0.4$ ,  $-1.1\pm 0.4$  and  $-1.2\pm 0.1$ ,  
9 respectively, but only  $-0.3\pm 0.3$  in condition **b** (One-way ANOVA  $F=24.1$ ,  $P=6E-10$ , Bonferroni for **b** vs **a**, **c**  
10 or **d** gave  $P\leq 2E-7$ ,  $P>0.9$  for all other combinations,  $n=12-14$ /condition). Similarly to the effect of BIC, PTX  
11 administered after Thio-THIP resulted in a TCD near 0 for condition **a**, **c**, and **d** but  $0.9\pm 0.3$  for condition **b**  
12 (one-way ANOVA  $F=20.1$   $P=1E-8$ , Bonferroni for **b** vs **a**, **c** and **d** gave  $P<3E-5$ ,  $P>0.79$  for other  
13 combinations,  $n = 12-14$ /condition, see table 1). The change in noise, a measure reflecting open-channel  
14 probability (only condition **b** and **d** for Thio-THIP analyzed), was ns from baseline to Thio-THIP in  
15 recording condition **b** (mean pA $\pm$ SD)  $1.61\pm 0.36$  and  $1.65\pm 0.39$ , respectively ( $P=0.2$ , paired t-test,  $n=14$ ), but  
16 increased in condition **d** from  $1.72\pm 0.34$  during baseline to  $2.2\pm 0.4$  in Thio-THIP ( $P=0.02$ , paired t-test,  
17  $n=12$ ). We did not detect a significant difference in baseline noise in recording condition **b** vs **d** ( $P=0.4$ , t-  
18 test). The TCD observed for THIP (2  $\mu$ M, figure 2F, G) displayed a similar effect as Thio-THIP. In this case,  
19 the effect of THIP in conditions **a**, **c** and **d** resulted in a TCD of (mean pA/pF $\pm$ SD)  $-4.4\pm 0.7$ ,  $-5.5\pm 0.9$  and -  
20  $4.9\pm 1.2$ , respectively, but  $-2.4\pm 0.7$  in condition **b** (one-way ANOVA  $F=13.1$ ,  $P=1E-5$ , Bonferroni for **b** vs **a**,  
21 **c** and **d** gave  $P\leq 0.007$ ,  $P>0.32$  for all other combinations,  $n=8-10$ /condition, see table 1). The effect of THIP  
22 was reversed to baseline levels by PTX for condition **a**, **c** and **d** and to levels above the baseline for condition  
23 **b** (one-way ANOVA  $F=11.8$   $P=1E-6$ , Bonferroni for **b** vs **a**, **c** and **d** gave  $P<4E-3$ ,  $P>0.8$  for other  
24 combinations,  $n = 8-10$ /condition, see table 1)

25 figure 2 and table 1). Because of the significantly increased response to orthosteric agonists in conditions **a**, **c**  
26 and **d** vs **b**, we conclude that a net receptor internalization could not be the reason for the absent constitutive

**Running title:** Constitutive current by GABA<sub>A</sub> receptors

1 current under condition **a**, **c** and **d**. While the TCD induced by  $\delta$ -subunit specific orthosteric agonists was  
2 highly dependent on recording condition (figure 2A, C-G), the peak of the averaged non-contaminated  
3 mIPSC was, however, similarly diminished by Thio-THIP in all conditions (figure 2B, 2D, E). The reduction  
4 in the synaptic mIPSC occurs because peri-synaptic  $\alpha_4\beta_{1/3}\delta$  receptors activated by bath applied Thio-THIP  
5 are not available for “further” activation by synaptically released GABA, and therefore the peak is composed  
6 of fewer GABA-activated channels, and thus reduced. This suggested that peri-synaptic and Thio-THIP-  
7 responding receptors contributing to the mIPSC are not subject to the same regulation imposed by the  
8 recording conditions as extrasynaptic receptors, and probably not similarly phosphorylated as non-synaptic  
9 receptors. For Thio-THIP (figure 2D), the peak mIPSC was reduced from (mean pA $\pm$ SD) -20.0 $\pm$ 6.3 to -  
10 15.8 $\pm$ 6.2 (condition **a**, n=12, P=2E-6, paired t-test), in condition **b** from -35.6 $\pm$ 8.8 to -30.4 $\pm$ 9.0 (n=14, P=2E-  
11 6), in condition **c** from -38.7 $\pm$ 7.6 to -34.1 $\pm$ 7.6 (n=14, P=0.01) and in condition **d** from -34.6 $\pm$ 8.7 to -29.1 $\pm$ 7.4  
12 (n=12, P=0.001). The selectivity of Thio-THIP for  $\delta$ -subunit containing receptors in mediating effects on  
13 TCD and mIPSC peak was assessed in  $\delta^{-/-}$  mice (figure 2H). Recording from DGGCs in condition **d**, Thio-  
14 THIP (100  $\mu$ M) induced a TCD of (mean pA/pF $\pm$ SD) -0.8 $\pm$ 0.2 in  $\delta^{+/+}$  mice, but -0.1 $\pm$ 0.2 in  $\delta^{-/-}$  mice (t-test,  
15 n=9/10, P =8E-7). Similarly, the Thio-THIP-induced reduction in mIPSC peak, observed in rat DGGCs  
16 (figure 2B, D) was also seen in  $\delta^{+/+}$  mice (-41.4 $\pm$ 9.0 pA in baseline vs -37.4 $\pm$ 9.0 pA in Thio-THIP, paired t-  
17 test, n=9, P=0.01), but absent in  $\delta^{-/-}$  mice (-37.1 $\pm$ 7.6 in baseline vs -37.2 $\pm$ 7.5 in Thio-THIP, paired t-test,  
18 n=10, P=0.9). We did not analyze the synaptic response to THIP, because the noise associated with the effect  
19 led to very significant distortion of the waveform, interfering with detection and analysis.

20 *Figure 3 near here*

21 It is commonly presumed that GBZ cannot close GABA<sub>A</sub> receptor channels displaying constitutive activity  
22 (Bai et al., 2001; McCartney et al., 2007; Włodarczyk et al., 2013). Therefore, the recognized ability to  
23 minimize the constitutive gating through the recording condition also offered a new and untried possibility  
24 for probing the antagonist effects of GBZ. If GBZ is a neutral antagonist at constitutively active receptors, it  
25 follows that we should expect a TCD near zero for GBZ in the conditions under which the constitutive gating  
26 is shut. However, in these conditions, GBZ (10  $\mu$ M), although completely blocking all mIPSCs, also induced

**Running title:** Constitutive current by GABA<sub>A</sub> receptors

1 a TCD, i.e. an apparent receptor activation, of (mean pA/pF±SD)  $-1.0\pm0.3$ ,  $-1.1\pm0.3$  and  $-1.2\pm0.3$  in  
2 condition **a**, **c** and **d** respectively, but only  $-0.2\pm0.2$  in condition **b** (one-way ANOVA,  $F=20.7$ ,  $P=2E-8$ ,  
3 Bonferroni for **b** vs **a**, **c** and **d** gave  $P<1E-5$ ,  $P>0.62$  for other combinations,  $n=10-12$ /condition). The effect  
4 of GBZ introducing a TCD in condition **a**, **c** and **d** was reversed to baseline levels by  $100\ \mu\text{M}$  PTX, and for  
5 condition **b**, to above baseline, producing a TCD of  $0.9\pm0.3$  pA/pF±SD (one-way ANOVA  $F=19.2$   $P=7E-8$ ,  
6 Bonferroni for **b** vs **a**, **c** and **d** gave  $P<3E-4$ ,  $P>0.71$  for other combinations, figure 3, table 1). The block of  
7 the mIPSCs by GBZ was complete in  $< 20$  secs from onset, and coincident with onset of the TCD, which  
8 continued to develop for at least 2 min (figure 3). A concentration-response relation of GBZ for this effect  
9 recorded in condition **d** gave an  $EC_{50}$  of  $2.1\ \mu\text{M}$  (five concentrations in the range  $10\ \text{nM}$  to  $50\ \mu\text{M}$  GBZ  
10 tested, figure 3D, one concentration/cell). When reversing the order of administration for PTX (to 1<sup>st</sup>) and  
11 GBZ (2<sup>nd</sup>) in recording condition **d**, GBZ produced no change in TCD ( $0.0\pm0.3$  pA/pF±SD,  $n = 4$ ). However,  
12 if the constitutive current in condition **b** was first shut by  $20\ \mu\text{M}$  BIC before perfusion of GBZ ( $10\ \mu\text{M}$ ), we  
13 found that GBZ now induced a TCD of  $-1.3\pm0.4$  pA/pF±SD which again could be shut by  $100\ \mu\text{M}$  PTX  
14 (figure 3B, as originally observed in (Włodarczyk et al., 2013). The difference in TCD produced by GBZ ( $10$   
15  $\mu\text{M}$ ) in condition **b**+ $20\ \mu\text{M}$  BIC ( $-1.3\pm0.4$  pA/pF±SD,  $n= 8$ ) and condition **c** or **d** ( $-1.1\pm0.2$ ,  $-1.2\pm0.2$   
16 pA/pF±SD,  $n = 14$  and  $12$ , respectively, table 1) was non-significant (one-way ANOVA,  $F=1.89$ ,  $P=0.16$ ).

17 *Table 1 near here*

18 To assess if this apparent agonistic effect of GBZ was dependent on GABA<sub>A</sub> receptors incorporating the  $\delta$ -  
19 subunit, we first tested GBZ ( $1\ \mu\text{M}$ ) in the presence of the  $\delta$ -subunit positive modulator DS2 ( $1\ \mu\text{M}$ ). In  
20 recording condition **d**, bath application of DS2 ( $1\ \mu\text{M}$ ) and subsequent (3 min later) administration of GBZ  
21 ( $1\ \mu\text{M}$ ) increased TCD to  $-1.1\pm0.3$  pA/pF±SD ( $n=8$ ). This was significantly larger than the TCD for  
22 application of  $1\ \mu\text{M}$  DS2 ( $-0.2\pm0.1$ ,  $n=5$ ) or  $1\ \mu\text{M}$  GBZ ( $-0.3\pm0.5$ ,  $n=8$ ) alone (one-way ANOVA,  $F=16.5$ ,  
23  $P=8.6E-5$ , Bonferroni  $P<3E-4$ ) albeit analysis for synergism of the combination value of  $-1.1\pm0.3$  vs the  
24 calculated sum ( $-0.5\pm0.3$ , independence assumed), was not made. Further, the effect of GBZ ( $10\ \mu\text{M}$ )  
25 recorded under condition **d** in  $\delta^{-/-}$  mice was  $0.0\pm0.1$ , but  $-0.9\pm0.2$  in  $\delta^{+/+}$  mice ( $n = 7/7$ ,  $P=0.002$ , t-test, figure 3  
26 I), indicating that the effects of GBZ in producing a TCD was indeed dependent on presence of the  $\delta$ -subunit.

**Running title:** Constitutive current by GABA<sub>A</sub> receptors

1 Finally, we assessed whether the effect of GBZ in producing a TCD could be mediated through homomeric  
2 rho1 GABA<sub>A</sub> receptors and tested 10 μM TPMPA in condition **d**, which was ineffective in blocking the  
3 effects of GBZ (TCD was  $-1.1 \pm 0.3$  pA/pF in GBZ vs  $-1.3 \pm 0.3$  pA/pF in GBZ + TPMPA,  $P=0.4$ ,  $n=5$ , t-test).  
4 However, despite these clear effects of GBZ in inducing a current in receptors incorporating the  $\delta$ -subunit  
5 with at least partial contribution from the  $\beta_1$  subunit (below, figure 5), we could not demonstrate such effects  
6 of GBZ in HEK-293 cells expressing human recombinant  $\alpha_4\beta_{1/3}\delta$  receptors (figure 4). Using a recently  
7 characterized assay employing voltage-sensitive fluorescence emitting dyes (Falk-Petersen et al., 2017), the  
8 effect of GABA, GBZ and BIC was characterized at human  $\alpha_4\beta_1\delta$  receptors at 37 and 22 °C. At 37 °C,  
9 GABA displayed an EC<sub>50</sub> value of 0.35 μM ( $pEC_{50}=6.5 \pm 0.13$ ,  $n=3$ ) (figure 4A), and GBZ displayed an IC<sub>50</sub>  
10 value of 0.42 μM ( $pIC_{50}=6.4 \pm 0.20$ ,  $n=3$ ) against a concentration of EC<sub>80</sub> of GABA (figure 4B). Similarly, at  
11 human  $\alpha_4\beta_3\delta$  receptors, GABA displayed an EC<sub>50</sub> value of 0.35 μM ( $pEC_{50}=6.5 \pm 0.03$ ,  $n=3$ ) (figure 4D) and  
12 GBZ displayed an IC<sub>50</sub> of 0.50 μM ( $pIC_{50}=6.3 \pm 0.07$ ,  $n=3$ ) (figure 4E). The constitutive activity at both 37 °C  
13 and 22 °C was negligible (no effect of BIC at baseline activity, not shown), and we did not observe any current  
14 induced by GBZ at neither receptor subtype (figure 4C, F).

15 *Figure 4 near here*

16 Because the effect of GBZ and Thio-THIP were both dependent on the presence of the  $\delta$ -subunit and both  
17 ineffective at producing a significant TCD when the constitutive gating was present (condition **b**, figure 2  
18 and table 1), we hypothesized that their effects were mediated by the same receptors. We tested in conditions  
19 **b** and **d** if GBZ (1 and 10 μM) could affect the TCD induced by Thio-THIP (100 μM). In condition **b**, Thio-  
20 THIP induced a TCD of  $-0.3 \pm 0.3$  pA/pF $\pm$ SD which was not changed by 10 μM GBZ (paired t-test,  $P=0.6$ ,  
21  $n=8$ , figure 5A). In condition **d**, the TCD induced by Thio-THIP ( $-1.2 \pm 0.2$  pA/pF $\pm$ SD,  $n = 13$ , figure 5B)  
22 also was not significantly changed by 1 μM GBZ (paired t-test,  $n=5$ ,  $P=0.25$ ) or 10 μM GBZ (paired t-test,  
23  $n=8$ ,  $P=0.1$ ).

24 *Figure 5 near here*



**Running title:** Constitutive current by GABA<sub>A</sub> receptors

1 Because the effects of GBZ (at 10  $\mu$ M, maximum effect, figure 5B) and Thio-THIP were not additive, this  
2 suggested that their effects could be mediated through the same (saturable) mechanism. Thio-THIP displays  
3 a selectivity for the  $\alpha_4\beta_{1/3}\delta$  receptor subtype, sparing other hippocampal  $\delta$ -subunit partnerships (for a list of  
4 receptor configurations tested, see (Hoestgaard-Jensen et al., 2014)). To assess if a  $\beta$  subunit could be  
5 involved in this response, we repeated the Thio-THIP–GBZ interaction study in mice ablated of the  $\beta_1$   
6 subunit and made recordings in condition *d* (figure 5C-G). In the  $\beta_1^{+/+}$  mice, Thio-THIP induced a TCD of  
7 (mean pA/pF $\pm$ SD)  $-0.9\pm 0.3$  compared to  $-0.7\pm 0.4$  in  $\beta_1^{-/-}$  mice ( $n=18/22$ ,  $P=0.18$ ). However, the ensuing  
8 effect of GBZ (10  $\mu$ M) produced different effects on the TCD between genotypes. In  $\beta_1^{+/+}$  mice, GBZ added  
9 after Thio-THIP, produced a TCD of  $-0.9\pm 0.4$  (Thio-THIP vs Thio-THIP+GBZ,  $n=18$ ,  $P=0.5$  paired t-test),  
10 but significantly reduced the TCD in  $\beta_1^{-/-}$  mice to  $-0.4\pm 0.4$  (Thio-THIP vs Thio-THIP+GBZ,  $n=22$ ,  $P=1E-4$   
11 paired t-test). The noise (SD) during baseline and during Thio-THIP application was independent on  
12 genotype (figure 5E), whereas GBZ reduced noise in  $\beta_1^{-/-}$  to a level below that of the  $\beta_1^{+/+}$  (GBZ+Thio-THIP  
13 in  $\beta_1^{+/+}$  produced a noise of  $1.37\pm 0.26$  but  $1.18\pm 0.29$  in  $\beta_1^{-/-}$  mice ( $P=0.04$ ,  $n=22/18$ , t-test). An additional  
14 qualitative observation was that the onset of the noise by Thio-THIP, or the shutting of it by GBZ, was fast  
15 (see figure 5A-B and 5G), reaching a plateau within tens of seconds after onset, whereas the TCD by either  
16 Thio-THIP or GBZ continued to develop for typically 2 minutes after onset. These data obtained in  $\beta_1^{-/-}$  mice  
17 infer that the GBZ response involves, at least in part,  $\beta_1$ -containing receptor subtypes – in addition to  $\delta$ -  
18 subunit containing receptors, possibly in a common subtype, e.g.  $\alpha_4\beta_1\delta$ .

19 We next wanted to analyze possible compensatory changes in GABA<sub>A</sub> receptor subunit levels as a  
20 consequence of the  $\beta_1$  deletion. To address this we compared the expression levels of  $\alpha_1$ ,  $\alpha_4$ ,  $\beta_2$ ,  $\beta_3$ ,  $\delta$  and  $\gamma_2$   
21 GABA<sub>A</sub> subunits in  $\beta_1^{-/-}$  and  $\beta_1^{+/+}$  counterparts by Western blotting. As illustrated in figure 5H,  $\beta_1^{-/-}$  and  $\beta_1^{+/+}$   
22 whole hippocampal tissue did not exhibit significant differences in the content of the subunits (blots in  
23 extended data set, figure 5-1). Albeit only the entire hippocampus was investigated, these data support that  
24 the  $\beta_1$ -subunit plays a direct role in the observed effects of GBZ, and that this is not a result of compensatory  
25 mechanisms pertaining to related subunits, either by sequence or expression profile.

26 *Figure 6 near here*

**Running title:** Constitutive current by GABA<sub>A</sub> receptors

1 Despite the fact that GBZ and Thio-THIP induced a TCD of similar magnitude, GBZ did so without any  
2 increase in the noise. A functional arrangement that may explain and link these discrepant observations is by  
3 considering the possibility of a predominately dendritic location of the GBZ current source. Due to the  
4 filtering properties of the dendrites, the visible noise must originate electrotonically close to the soma  
5 (recording electrode), whereas the magnitude of the TCD, the DC component, is much less restricted by  
6 filtering (Spruston et al., 1993; Johnston, 1995). We assessed the possibility that the TCD induced by GBZ  
7 could have significant distal dendritic contribution in rats by comparing the effect of GBZ (1  $\mu$ M) on evoked  
8 events from electrotonically proximal and distal loci, recorded from rat DGGCs in condition *b* and *d* (figure  
9 6). The peak current was normalized to the slope of the I-V curve and the reversal potential for the proximal  
10 and distal events calculated from linear fits demonstrating the presence of a significant space-clamp error  
11 resulting in a difference of 21.8 mV for the reversal potential of the proximal vs the distal event (figure 6A-  
12 B). The difference in reversal potential can be used to identify the origin of the spontaneous- and mIPSCs,  
13 because spontaneous IPSCs reversed at the same potential as the proximally evoked inhibitory event (not  
14 shown), arguing for an origin of spontaneous IPSCs at electrotonically short distances from the soma (see  
15 also (Soltesz et al., 1995)). A few neurons were filled with biocytin to reveal the extent of the dendritic tree  
16 (figure 6C). The distance between the proximal and distal stimulation electrodes were on average 260  $\mu$ m  
17 (range 210 – 290  $\mu$ m), largest for cells recorded from slices that originated ~350  $\mu$ m ventral to the  
18 hippocampal commissure (which was the most dorsal slices recorded from). The inhibitory effect of GBZ (1  
19  $\mu$ M) on proximal and distal evoked inhibitory events (figure 6D), recorded in condition *b* and *d* showed that  
20 a distal component was reduced significantly less, and at a slower rate in condition *d* than *b*.

21

22 **Discussion**

23 In the present study we show that the magnitude of the constitutive and the agonist-induced tonic current  
24 passed by possibly  $\alpha_4\beta_{1/3}\delta$  GABA<sub>A</sub> receptors in adult rodent DGGCs is determined by temperature, free  
25 intracellular Ca<sup>2+</sup> levels and PKC activity. By comparing effects of the orthosteric agonists THIP and Thio-  
26 THIP, the orthosteric antagonists BIC and GBZ, and the channel blocker PTX in four different recording

**Running title:** Constitutive current by GABA<sub>A</sub> receptors

1 conditions in adult rats,  $\delta^{+/+}$ ,  $\delta^{-/-}$ ,  $\beta_1^{+/+}$  and  $\beta_1^{-/-}$  mice, we demonstrate the existence of an inverse relationship  
2 of the constitutive vs. the agonist-induced tonic current in DGGCs. Further, we show that only under the  
3 conditions of a shut constitutive current, does GBZ induce a PTX-sensitive tonic current. This current is  
4 completely dependent on the expression of the  $\delta$ - and to some degree also the  $\beta_1$ -subunit, elucidated with the  
5 first *in vitro* phenotypical description of a  $\beta_1^{-/-}$  mouse strain. However, this effect of GBZ could not be  
6 replicated in human  $\alpha_4\beta_{1/3}\delta$  receptors expressed in HEK-293 cells, suggesting a component missing in HEK  
7 cells, compared to DGGCs. Our data suggest that *in vivo* efficacy of  $\delta$ -subunit specific agonists (i.e. THIP) in  
8 DGGCs, is diminished in conditions of increased PKC activity.

9

10 *Constitutive activity of GABA<sub>A</sub> receptors*

11 The four different recording conditions (**a-d**) were chosen because of previous findings that implicate  
12 temperature and kinase activity as regulators of  $\delta$ -subunit containing GABA<sub>A</sub> receptors (Wei et al., 2003;  
13 Houston et al., 2007; Bright et al., 2011; Bright and Smart, 2013). The different effect of conditions (table 1),  
14 suggest that the endogenous TCD is mediated by intracellular high activity of kinase activity in condition **b**,  
15 most likely mediating specific phosphorylation of receptor subunits (discussed below). Recordings at 24 °C  
16 gave similar result as kinase inhibition at 34 °C, which we suggest is a consequence of low kinase activity at  
17 24 °C, because PKC in this case does not readily translocate to the plasma membrane in mammalian cells  
18 (Chemin et al., 2007). Since the responses to the orthosteric agonists Thio-THIP and THIP were increased in  
19 condition **a**, **c** and **d** (relative to **b**, figure 2, table 1, see below), the same conditions for which the TCD was  
20 absent (**a**, **c** and **d**, figure 1, table 1), two conclusions are made. First, the absence of an endogenous TCD in  
21 condition **a**, **c** and **d**, is not due to internalization of  $\delta$ -subunit containing receptors, and second, the TCD in  
22 condition **b** must be the result of constitutively active receptors that can be shut by PKC inhibition, BIC and  
23 PTX (figure 1 and 2, table 1) but not by GBZ (see below). The constitutively active receptors recorded in  
24 condition **b**, were also detected in  $\delta^{+/+}$  but not in  $\delta^{-/-}$  mice, identifying the  $\delta$ -subunit as necessary and  
25 sufficient for the measured constitutive current.

**Running title:** Constitutive current by GABA<sub>A</sub> receptors

1

2 *Response to THIP and Thio-THIP in different recording conditions*

3 Results obtained with THIP and Thio-THIP were qualitatively similar, although the higher effect-ratio  
4 between conditions **b** and **c** or **d** (~ 2 for THIP but ~4 for Thio-THIP) suggest that PKC inhibition or  
5 chelating of intracellular Ca<sup>2+</sup> affect receptors that are targets for Thio-THIP more selectively. We shall  
6 therefore focus this discussion on  $\alpha_4\beta_{1/3}\delta$  receptors due to the selectivity of Thio-THIP (Hoestgaard-Jensen et  
7 al., 2014). Since the  $\alpha_4\beta_{1/3}\delta$ , but not  $\alpha_4\beta_2\delta$  receptors, exhibit constitutive gating in oocytes and upon PKA-  
8 activation in HEK cells (Tang et al., 2010; Jensen et al., 2013; Hoestgaard-Jensen et al., 2014), these  
9 subtypes appear plausible candidates for the constitutive gating in DGGCs. Studies examining the co-  
10 existence of a PKA activated constitutive current and GABA activated current in  $\alpha_4\beta_3\delta$  GABA<sub>A</sub> receptors in  
11 HEK cells, demonstrated that the constitutive current sets the baseline floor, under which sufficiently low  
12 concentrations of agonist is ineffective at increasing channel open-probability (Tang et al., 2010). Our data in  
13 DGGCs are in support of this, since the effect of Thio-THIP on the TCD is minimal in condition **b** (high  
14 constitutive current), but ~4 times more effective in condition **a**, **c** and **d** (no constitutive current, figure 1A,  
15 2A).

16 The effect of a high concentration of EGTA or inhibitor of PKC in the ICS on the endogenous TCD and  
17 response to agonists, suggests an already high level of endogenous kinase activity and receptor  
18 phosphorylation at 34 °C in low concentration of EGTA in the ICS (see also (Brandon et al., 2000; Bright et  
19 al., 2011; Bright and Smart, 2013)). It is therefore interesting to note that the effect of Thio-THIP on the  
20 synaptic response was independent on the recording condition (figure 2B), suggesting that Thio-THIP-  
21 responding receptors in the synapse are not similarly sensitive to kinase activity as extrasynaptic receptors.  
22 GABA<sub>A</sub> receptors interact with, among others, gephyrin, GABARAP, calreticulin (gC1q-R) and  
23 AKAP79/150 through a ~30 AA long domain in the intracellular TM3-TM4 loop (Essrich et al., 1998; Wang  
24 et al., 1999; Schaerer et al., 2001; Brandon et al., 2003). Receptor anchoring at the synapse requires gephyrin  
25 interaction, and the binding domain for gephyrin has been mapped in the  $\beta$ -subunits, and shown to overlap  
26 the S383 (CaMKII site) and the S408/409/410 (PKA and PKC site) (Maric et al., 2011; Kowalczyk et al.,

**Running title:** Constitutive current by GABA<sub>A</sub> receptors

1 2013; Maric et al., 2017). Trafficking of GABA<sub>A</sub> and glycine receptors is sensitive to calcineurin and PKC  
2 activity due in part to phosphorylation of gephyrin (Bannai et al., 2009; Specht et al., 2011; Tyagarajan et  
3 al., 2011; Zacchi et al., 2014). However, phosphorylation of receptor subunits are likely to also play a role in  
4 anchoring to gephyrin, as phosphorylation of the S409 residue in a GABA<sub>A</sub> receptor subunit  $\beta_1$  fragment also  
5 reduces the affinity to gephyrin fragments (Maric, personal communication).

6

7 *GBZ and the constitutive current in DGGCs*

8 The two orthosteric GABA<sub>A</sub> receptor antagonists, GBZ and BIC, exert different effects against  
9 spontaneously active GABA<sub>A</sub> receptors: BIC shuts spontaneously active receptors and is termed an inverse  
10 agonist whereas GBZ is ineffective towards these and termed a neutral antagonist (Birner et al., 2000; Bai et  
11 al., 2001; McCartney et al., 2007; Wlodarczyk et al., 2013). The constitutive current in recording condition **b**  
12 can be closed by BIC and possibly displaced by GBZ for receptors to resume constitutive gating (see  
13 (McCartney et al., 2007; Wlodarczyk et al., 2013) and figure 3B). However, since GBZ introduces a current  
14 by itself only under conditions of a shut constitutive current, we conclude that the TCD is the result of an  
15 action by GBZ at a shut receptor, and not BIC displacement. Similar to the effect of Thio-THIP in recording  
16 condition **b** described above, the effect of GBZ was hidden in the already active constitutive current. This  
17 effect of GBZ in DGGCs was PTX- and DS2-sensitive, completely  $\delta$ -subunit dependent, TPMPA-  
18 insensitive, partially  $\beta_1$ -dependent and displayed an EC<sub>50</sub> of 2.1  $\mu$ M. However, we were unable to  
19 demonstrate that GBZ induces a current in recombinant  $\alpha_4\beta_{1/3}\delta$  receptors expressed in HEK-293 cells (figure  
20 4 A-F). It is possible that intracellular components acting through the TM3-TM4 loop at  $\beta$  subunits  
21 mediating the effects of GBZ in DGGCs, are missing in the HEK-293 cells. Alternatively, it is possible that  
22  $\delta$ -subunit containing  $\alpha$ - or  $\beta$ -heterodimer receptors in dendrites of DGGCs with a different response to Thio-  
23 THIP, THIP and GBZ are responsible. Since GBZ had no effect on the TCD induced by Thio-THIP in  $\beta_1^{+/+}$   
24 mice, but reduced the TCD by Thio-THIP in  $\beta_1^{-/-}$  mice (figure 5C, D), we conclude that, in addition to the  $\delta$ -  
25 subunits, the  $\beta_1$  subunit containing receptors are also involved in the response by GBZ, but not exclusively

**Running title:** Constitutive current by GABA<sub>A</sub> receptors

1 so. We hypothesize that GBZ induces a specific receptor state, which also characterizes the phosphorylated,  
2 constitutively active  $\alpha_4\beta_{1/3}\delta$  receptors.

3

4 *The GBZ mediated current originates in distal dendrites*

5 The TCD induced by GBZ in condition **a**, **c** and **d** carried much less noise compared to the similar TCD  
6 magnitude induced by Thio-THIP in the same conditions (for mice, figure 5D, E). This discrepancy between  
7 noise and TCD may be explained by a dendritic origin of the GBZ-current, since the low-pass filtering  
8 properties of the dendrites reduce the noise, but much less the DC-component (Spruston et al., 1993;  
9 Johnston, 1995). The different response to GBZ of proximal and distal IPSCs in condition **b** and **d** (figure 6)  
10 suggests that this is indeed the case, supported by the lack of high affinity GBZ responding channels at the  
11 soma (Włodarczyk et al., 2013) and by the identification of a temperature-sensitive population of  $\delta$ -subunit  
12 containing GABA<sub>A</sub> receptors in the dendrites of DGGCs (Wei et al., 2003). This very likely reflects the same  
13 population of receptors in DGGCs seen here, given that recordings at 24 °C are comparable to recordings at  
14 34 °C including kinase inhibitors (figure 1A, 2A, 2F and 3A) with respect to effect of orthosteric agonists,  
15 constitutive current and effect of GBZ.

16 In conclusion, we have described the existence of kinase-dependent behavior of receptors that disguises the  
17 efficacy of orthosteric agonists and GBZ. A pathology involving increased  $\delta$ -subunit containing GABA<sub>A</sub>  
18 receptor phosphorylation would result in a reduced efficacy of the agonist *in vivo*, but not in a whole cell  
19 patch clamp analysis, because disease-state specific changes in intracellular Ca<sup>2+</sup>-homeostasis and kinase  
20 activity are, unavoidably, eliminated.

21

22

23

**Running title:** Constitutive current by GABA<sub>A</sub> receptors

1 **References**

- 2 Bai D, Zhu G, Pennefather P, Jackson MF, MacDonald JF, Orser BA (2001) Distinct functional and  
3 pharmacological properties of tonic and quantal inhibitory postsynaptic currents mediated by  
4 gamma-aminobutyric acid(A) receptors in hippocampal neurons. *Mol Pharmacol* 59:814-824.
- 5 Bannai H, Levi S, Schweizer C, Inoue T, Launey T, Racine V, Sibarita JB, Mikoshiba K, Triller A (2009) Activity-  
6 dependent tuning of inhibitory neurotransmission based on GABAAR diffusion dynamics. *Neuron*  
7 62:670-682.
- 8 Birnir B, Everitt AB, Lim MS, Gage PW (2000) Spontaneously opening GABA(A) channels in CA1 pyramidal  
9 neurones of rat hippocampus. *J Membr Biol* 174:21-29.
- 10 Brandon NJ, Jovanovic JN, Colledge M, Kittler JT, Brandon JM, Scott JD, Moss SJ (2003) A-kinase anchoring  
11 protein 79/150 facilitates the phosphorylation of GABA(A) receptors by cAMP-dependent protein  
12 kinase via selective interaction with receptor beta subunits. *Mol Cell Neurosci* 22:87-97.
- 13 Brandon NJ, Delmas P, Kittler JT, McDonald BJ, Sieghart W, Brown DA, Smart TG, Moss SJ (2000) GABAA  
14 receptor phosphorylation and functional modulation in cortical neurons by a protein kinase C-  
15 dependent pathway. *J Biol Chem* 275:38856-38862.
- 16 Bright DP, Smart TG (2013) Protein kinase C regulates tonic GABA(A) receptor-mediated inhibition in the  
17 hippocampus and thalamus. *Eur J Neurosci* 38:3408-3423.
- 18 Bright DP, Renzi M, Bartram J, McGee TP, MacKenzie G, Hosie AM, Farrant M, Brickley SG (2011) Profound  
19 desensitization by ambient GABA limits activation of delta-containing GABAA receptors during  
20 spillover. *J Neurosci* 31:753-763.
- 21 Chandra D, Jia F, Liang J, Peng Z, Suryanarayanan A, Werner DF, Spigelman I, Houser CR, Olsen RW, Harrison  
22 NL, Homanics GE (2006) GABAA receptor alpha 4 subunits mediate extrasynaptic inhibition in  
23 thalamus and dentate gyrus and the action of gaboxadol. *Proc Natl Acad Sci U S A* 103:15230-  
24 15235.

**Running title:** Constitutive current by GABA<sub>A</sub> receptors

- 1 Chemin J, Mezghrani A, Bidaud I, Dupasquier S, Marger F, Barrere C, Nargeot J, Lory P (2007) Temperature-  
2 dependent modulation of CaV3 T-type calcium channels by protein kinases C and A in mammalian  
3 cells. *J Biol Chem* 282:32710-32718.
- 4 Essrich C, Lorez M, Benson JA, Fritschy JM, Luscher B (1998) Postsynaptic clustering of major GABAA  
5 receptor subtypes requires the gamma 2 subunit and gephyrin. *Nat Neurosci* 1:563-571.
- 6 Falk-Petersen CB, Sogaard R, Madsen KL, Klein AB, Frolund B, Wellendorph P (2017) Development of a  
7 Robust Mammalian Cell-based Assay for Studying Recombinant alpha4 beta1/3 delta GABAA  
8 Receptor Subtypes. *Basic Clin Pharmacol Toxicol* 121:119-129.
- 9 Farrant M, Nusser Z (2005) Variations on an inhibitory theme: phasic and tonic activation of GABA(A)  
10 receptors. *Nat Rev Neurosci* 6:215-229.
- 11 Glykys J, Mody I (2007) Activation of GABAA receptors: views from outside the synaptic cleft. *Neuron*  
12 56:763-770.
- 13 Herd MB, Haythornthwaite AR, Rosahl TW, Wafford KA, Homanics GE, Lambert JJ, Belelli D (2008) The  
14 expression of GABAA beta subunit isoforms in synaptic and extrasynaptic receptor populations of  
15 mouse dentate gyrus granule cells. *J Physiol* 586:989-1004.
- 16 Hoestgaard-Jensen K, Dalby NO, Krall J, Hammer H, Krosgaard-Larsen P, Frolund B, Jensen AA (2014)  
17 Probing alpha4betadelta GABAA receptor heterogeneity: differential regional effects of a  
18 functionally selective alpha4beta1delta/alpha4beta3delta receptor agonist on tonic and phasic  
19 inhibition in rat brain. *J Neurosci* 34:16256-16272.
- 20 Houston CM, Lee HH, Hosie AM, Moss SJ, Smart TG (2007) Identification of the sites for CaMK-II-dependent  
21 phosphorylation of GABA(A) receptors. *J Biol Chem* 282:17855-17865.
- 22 Jensen ML, Wafford KA, Brown AR, Belelli D, Lambert JJ, Mirza NR (2013) A study of subunit selectivity,  
23 mechanism and site of action of the delta selective compound 2 (DS2) at human recombinant and  
24 rodent native GABA(A) receptors. *Br J Pharmacol* 168:1118-1132.



**Running title:** Constitutive current by GABA<sub>A</sub> receptors

- 1 Johnston DM-SW, S. (1995) Foundations of Cellular Neurophysiology. Cambridge Massachusetts; London  
2 England: MIT Press.
- 3 Kowalczyk S, Winkelmann A, Smolinsky B, Forstera B, Neundorf I, Schwarz G, Meier JC (2013) Direct binding  
4 of GABAA receptor beta2 and beta3 subunits to gephyrin. *Eur J Neurosci* 37:544-554.
- 5 Krehan D, Frolund B, Ebert B, Nielsen B, Krogsgaard-Larsen P, Johnston GA, Chebib M (2003) Aza-THIP and  
6 related analogues of THIP as GABA C antagonists. *Bioorg Med Chem* 11:4891-4896.
- 7 Lee V, Maguire J (2014) The impact of tonic GABAA receptor-mediated inhibition on neuronal excitability  
8 varies across brain region and cell type. *Front Neural Circuits* 8:3.
- 9 Maric HM, Mukherjee J, Tretter V, Moss SJ, Schindelin H (2011) Gephyrin-mediated gamma-aminobutyric  
10 acid type A and glycine receptor clustering relies on a common binding site. *J Biol Chem* 286:42105-  
11 42114.
- 12 Maric HM, Hausrat TJ, Neubert F, Dalby NO, Doose S, Sauer M, Kneussel M, Stromgaard K (2017) Gephyrin-  
13 binding peptides visualize postsynaptic sites and modulate neurotransmission. *Nat Chem Biol*  
14 13:153-160.
- 15 Martenson JS, Yamasaki T, Chaudhury NH, Albrecht D, Tomita S (2017) Assembly rules for GABAA receptor  
16 complexes in the brain. *Elife* 6.
- 17 McCartney MR, Deeb TZ, Henderson TN, Hales TG (2007) Tonically active GABAA receptors in hippocampal  
18 pyramidal neurons exhibit constitutive GABA-independent gating. *Mol Pharmacol* 71:539-548.
- 19 Mihalek RM, Banerjee PK, Korpi ER, Quinlan JJ, Firestone LL, Mi ZP, Lagenaur C, Tretter V, Sieghart W,  
20 Anagnostaras SG, Sage JR, Fanselow MS, Guidotti A, Spigelman I, Li Z, DeLorey TM, Olsen RW,  
21 Homanics GE (1999) Attenuated sensitivity to neuroactive steroids in gamma-aminobutyrate type A  
22 receptor delta subunit knockout mice. *Proc Natl Acad Sci U S A* 96:12905-12910.
- 23 Olsen RW, Sieghart W (2008) International Union of Pharmacology. LXX. Subtypes of gamma-aminobutyric  
24 acid(A) receptors: classification on the basis of subunit composition, pharmacology, and function.  
25 Update. *Pharmacol Rev* 60:243-260.

**Running title:** Constitutive current by GABA<sub>A</sub> receptors

- 1 Othman NA, Gallacher M, Deeb TZ, Baptista-Hon DT, Perry DC, Hales TG (2012) Influences on blockade by t-  
2 butylbicyclo-phosphoro-thionate of GABA(A) receptor spontaneous gating, agonist activation and  
3 desensitization. *J Physiol* 590:163-178.
- 4 Overstreet-Wadiche L, McBain CJ (2015) Neurogliaform cells in cortical circuits. *Nat Rev Neurosci* 16:458-  
5 468.
- 6 Schaerer MT, Kannenberg K, Hunziker P, Baumann SW, Sigel E (2001) Interaction between GABA(A)  
7 receptor beta subunits and the multifunctional protein gC1q-R. *J Biol Chem* 276:26597-26604.
- 8 Soltesz I, Smetters DK, Mody I (1995) Tonic inhibition originates from synapses close to the soma. *Neuron*  
9 14:1273-1283.
- 10 Specht CG, Grunewald N, Pascual O, Rostgaard N, Schwarz G, Triller A (2011) Regulation of glycine receptor  
11 diffusion properties and gephyrin interactions by protein kinase C. *EMBO J* 30:3842-3853.
- 12 Sperk G, Schwarzer C, Tsunashima K, Fuchs K, Sieghart W (1997) GABA(A) receptor subunits in the rat  
13 hippocampus I: immunocytochemical distribution of 13 subunits. *Neuroscience* 80:987-1000.
- 14 Spruston N, Jaffe DB, Williams SH, Johnston D (1993) Voltage- and space-clamp errors associated with the  
15 measurement of electrotonically remote synaptic events. *J Neurophysiol* 70:781-802.
- 16 Tang X, Hernandez CC, Macdonald RL (2010) Modulation of spontaneous and GABA-evoked tonic  
17 alpha4beta3delta and alpha4beta3gamma2L GABA(A) receptor currents by protein kinase A. *J*  
18 *Neurophysiol* 103:1007-1019.
- 19 Tyagarajan SK, Ghosh H, Yevenes GE, Nikonenko I, Ebeling C, Schwerdel C, Sidler C, Zeilhofer HU, Gerrits B,  
20 Muller D, Fritschy JM (2011) Regulation of GABAergic synapse formation and plasticity by  
21 GSK3beta-dependent phosphorylation of gephyrin. *Proc Natl Acad Sci U S A* 108:379-384.
- 22 Wang H, Bedford FK, Brandon NJ, Moss SJ, Olsen RW (1999) GABA(A)-receptor-associated protein links  
23 GABA(A) receptors and the cytoskeleton. *Nature* 397:69-72.

**Running title:** Constitutive current by GABA<sub>A</sub> receptors

- 1 Wei W, Zhang N, Peng Z, Houser CR, Mody I (2003) Perisynaptic localization of delta subunit-containing  
2 GABA(A) receptors and their activation by GABA spillover in the mouse dentate gyrus. *J Neurosci*  
3 23:10650-10661.
- 4 Wlodarczyk AI, Sylantyev S, Herd MB, Kersante F, Lambert JJ, Rusakov DA, Linthorst AC, Semyanov A, Belelli  
5 D, Pavlov I, Walker MC (2013) GABA-independent GABA<sub>A</sub> receptor openings maintain tonic  
6 currents. *J Neurosci* 33:3905-3914.
- 7 Zacchi P, Antonelli R, Cherubini E (2014) Gephyrin phosphorylation in the functional organization and  
8 plasticity of GABAergic synapses. *Front Cell Neurosci* 8:103.
- 9 Zhang N, Wei W, Mody I, Houser CR (2007) Altered localization of GABA(A) receptor subunits on dentate  
10 granule cell dendrites influences tonic and phasic inhibition in a mouse model of epilepsy. *J*  
11 *Neurosci* 27:7520-7531.
- 12
- 13
- 14

**Running title:** Constitutive current by GABA<sub>A</sub> receptors

1 Figure 1. The magnitude of the GABA<sub>A</sub> receptor TCD in adult rat and mouse DGGCs depend on recording  
2 condition and expression of the  $\delta$ -subunit. The four recording conditions were *a*: 24 °C and 50  $\mu$ M EGTA in  
3 the ICS, *b*: 34 °C and 50  $\mu$ M EGTA in the ICS, *c*: 34 °C including 10  $\mu$ M PKC 19-36 autoinhibitory peptide  
4 and 50  $\mu$ M EGTA in the ICS, and *d*: 34 °C and 10 mM EGTA in the ICS. **A**: Representative recording traces  
5 from adult rats showing that 20  $\mu$ M BIC blocks IPSCs under all recording conditions, but also blocks a tonic  
6 current in condition *b*, which is absent in condition *a*, *c* and *d*. **B**: Summary of data from A, (n=12-14, \*\*\*: P  
7 < 0.001, ANOVA/Bonferroni). **C**: Summary of TCD in DGGCs recorded in condition *b* or *d* in  $\delta^{+/+}$  and  $\delta^{-/-}$   
8 mice (n=10/11). \*\*\*: P < 0.001, paired t-test (same cell) or t-test (different cell) .

9

**Running title:** Constitutive current by GABA<sub>A</sub> receptors

1 Figure 2. The effect of two GABA agonists, THIP ( $\delta$ -subunit preferring) and Thio-THIP ( $\alpha_4\beta_{1/3}\delta$  selective)  
2 on the TCD is dependent on temperature, intracellular Ca<sup>2+</sup>-EGTA chelation and PKC activity. **A:** Full  
3 recording traces of voltage clamped (-70 mV) DGGCs upon bath application of 100  $\mu$ M Thio-THIP followed  
4 by PTX. Thio-THIP induces a ~4 x larger TCD in condition **a**, **c** and **d** than condition **b**. Note the presence of  
5 a positive endogenous TCD in condition **b** only. **B:** Traces of mIPSCs display the Thio-THIP induced  
6 reduction of the average mIPSC in all recording conditions. **C:** Summary barplot of TCD values induced by  
7 Thio-THIP (n=12-14, \*\*\* P<0.001 ANOVA/Bonferroni) . **D-E:** Summary of peak and decay time of the  
8 average mIPSCs (\*\* P<0.01 paired t-test) . **F-G:** Representative traces and barplot showing the effect of  
9 THIP in recording condition **a** through **d** (n=8-10, \*\* P<0.01 ANOVA/Bonferroni). **H:** The TCD induced by  
10 Thio-THIP in adult  $\delta^{+/+}$  and  $\delta^{-/-}$  mice and the effect on the average mIPSC peak in the same recordings (n =  
11 9-10, \*\*\* P<0.001, \*\* P<0.01 paired t-test for same-cell measurements, unpaired for different cells).

12

**Running title:** Constitutive current by GABA<sub>A</sub> receptors

1 Figure 3. GBZ induces a  $\delta$ -subunit dependent TCD in adult rat DGGCs under recording conditions  
2 phenomenologically characterized by the absence of a constitutive current. **A:** Recording traces displaying  
3 the effect of GBZ and PTX in recording conditions **a-d**. GBZ quickly blocks mIPSCs, but also induces a  
4 TCD in condition **a, c** and **d**, which is reversed by PTX. **B:** Shutting of the constitutive current by BIC (20  
5  $\mu$ M) in recording condition **b** is reversed by GBZ (10  $\mu$ M). **C-D:** Concentration-response relation of GBZ in  
6 blocking mIPSCs, and inducing a TCD in recording condition **d**. **E:** Summary of effects of GBZ to induce a  
7 TCD in recording condition **a-d**, incl. recording condition **b** in which the constitutive current is shut by BIC.  
8 **F-G:** The  $\delta$ -subunit selective positive modulator DS2 potentiates the effect of GBZ in producing a PTX-  
9 sensitive tonic current. **H-I:** Recordings of DGGCs from adult  $\delta^{+/+}$  and  $\delta^{-/-}$  mice demonstrate that the effect of  
10 GBZ inducing a TCD is dependent on expression of the  $\delta$ -subunit. \*\*  $P < 0.01$ , t-test (figure I), \*\*\*  $P < 0.001$ ,  
11 ANOVA/Bonferroni.  
12

**Running title:** Constitutive current by GABA<sub>A</sub> receptors

1 Figure 4. GBZ antagonizes effect of GABA but does not induce a current alone in constitutively silent  $\alpha_4\beta_1\delta$   
2 and  $\alpha_4\beta_3\delta$  receptors expressed in HEK-293 Flp-In cells. **A, D:** GABA (■) activates human  $\alpha_4\beta_1\delta$  (A) and  
3  $\alpha_4\beta_3\delta$  (D) receptors with a similar  $EC_{50}$  of  $3.5E-7$  M. **B, E:** GBZ (▼) concentration-dependently blocks the  
4 response to an  $EC_{80}$  concentration of GABA with  $IC_{50} = 4.2E-7$  M at  $\alpha_4\beta_1\delta$  receptors (B) and  $5E-7$  M at  $\alpha_4\beta_3\delta$   
5 receptors (E). **C, F:** GBZ does not induce a current alone in any receptor type. All datapoints in graph **A-F**  
6 are means of triplicate measurements  $\pm$ SD. FU, fluorescence unit. Symbols below belong to both figures in  
7 the three vertical panels.

8

**Running title:** Constitutive current by GABA<sub>A</sub> receptors

1 Figure 5. GBZ does not antagonize the effect of Thio-THIP. **A:** Thio-THIP, GBZ and PTX on DGGCs in  
2 recording condition **b** in adult rats (n=8). **B:** Same experiment as A, recording condition **d**. Note that 10  $\mu$ M  
3 GBZ neither blocks, nor increases the TCD already induced by Thio-THIP (right panel, n=13). **C-D:** Thio-  
4 THIP and GBZ recorded in condition **d** in adult  $\beta_1^{+/+}$  and  $\beta_1^{-/-}$  mice (n=18/22). **E:** The noise (SD) induced by  
5 Thio-THIP and GBZ in  $\beta_1^{+/+}$  and  $\beta_1^{-/-}$  mice. The noise in Thio-THIP + GBZ is significantly lower in  $\beta_1^{-/-}$  than  
6  $\beta_1^{+/+}$  mice. **F-G:** The average mIPSC peak is similarly reduced by Thio-THIP in  $\beta_1^{+/+}$  and  $\beta_1^{-/-}$  mice. **H:**  
7 Western blots of whole hippocampal homogenate from  $\beta_1^{+/+}$  and  $\beta_1^{-/-}$  mice, displaying absence of  $\beta_1$  subunit  
8 immunoreactivity in  $\beta_1^{-/-}$  mice (left) and no significant compensatory changes in  $\alpha_1$ ,  $\alpha_4$ ,  $\beta_2$ ,  $\beta_3$ ,  $\delta$  and  $\gamma_2$   
9 subunits in  $\beta_1^{-/-}$  mice compared to  $\beta_1^{+/+}$  (right, see extended data figure 5-1 for individual WBs).

10



**Running title:** Constitutive current by GABA<sub>A</sub> receptors

1 Figure 6. GBZ is less effective at GABA<sub>A</sub> receptors at distal loci in DGGCs. **A:** IV relation of evoked events  
2 from proximal and distal loci. The results were normalized to the GABA<sub>A</sub> receptor conductance for the  
3 individual neuron. The reversal potential for proximal and distal evoked events differed by 21.8 mV,  
4 indicating a considerable space clamp error. **B:** Representative traces at -70, -10 and 10 mV. **C:** Biocytin  
5 filled and stained DGGC. **D:** Normalized proximal and distal events are not equally inhibited by GBZ,  
6 yielding a slower effect of GBZ in recording condition *d* compared to *b* and demonstrating less inhibition at  
7 the average response of event 21-25. \*\*\* P < 0.001, t-test, n=9/10.

8

**Running title:** Constitutive current by GABA<sub>A</sub> receptors

**Figure 1**

**A**

Adult Rats

Condition: *a* *b* *c* *d*  
— 20  $\mu$ M bicuculline

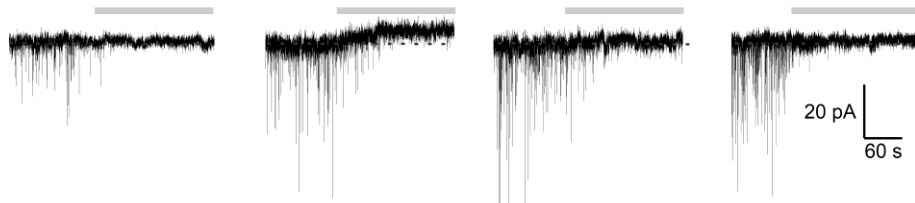

**B**

Adult Rats

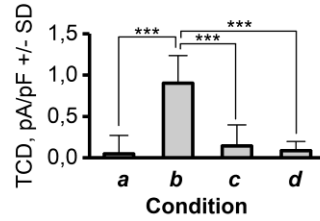

**C**

Adult Mice

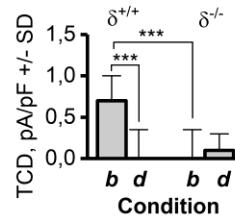

**Running title:** Constitutive current by GABA<sub>A</sub> receptors

**Figure 2**

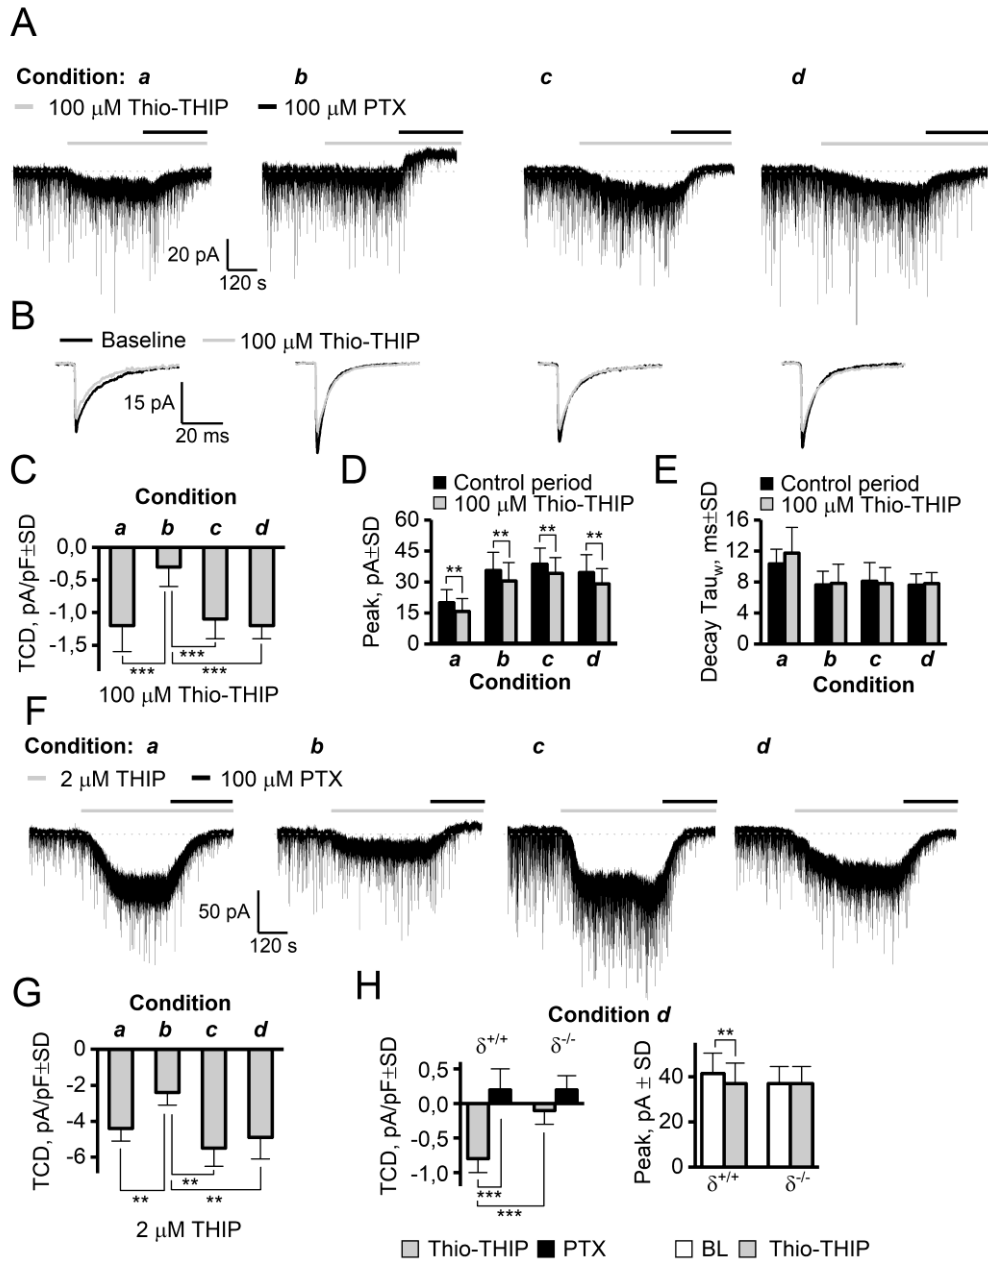

**Running title:** Constitutive current by GABA<sub>A</sub> receptors

**Figure 3**

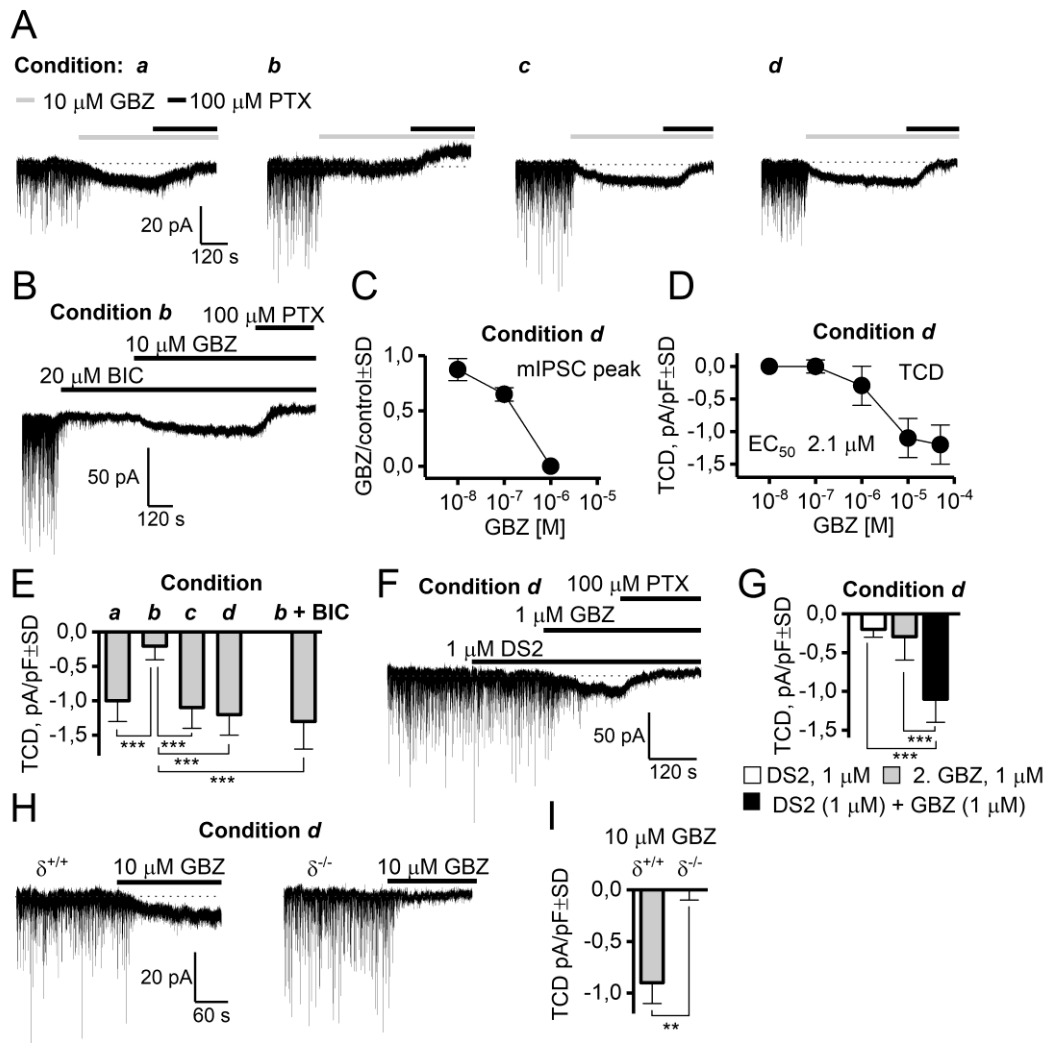

**Running title:** Constitutive current by GABA<sub>A</sub> receptors

**Figure 4**

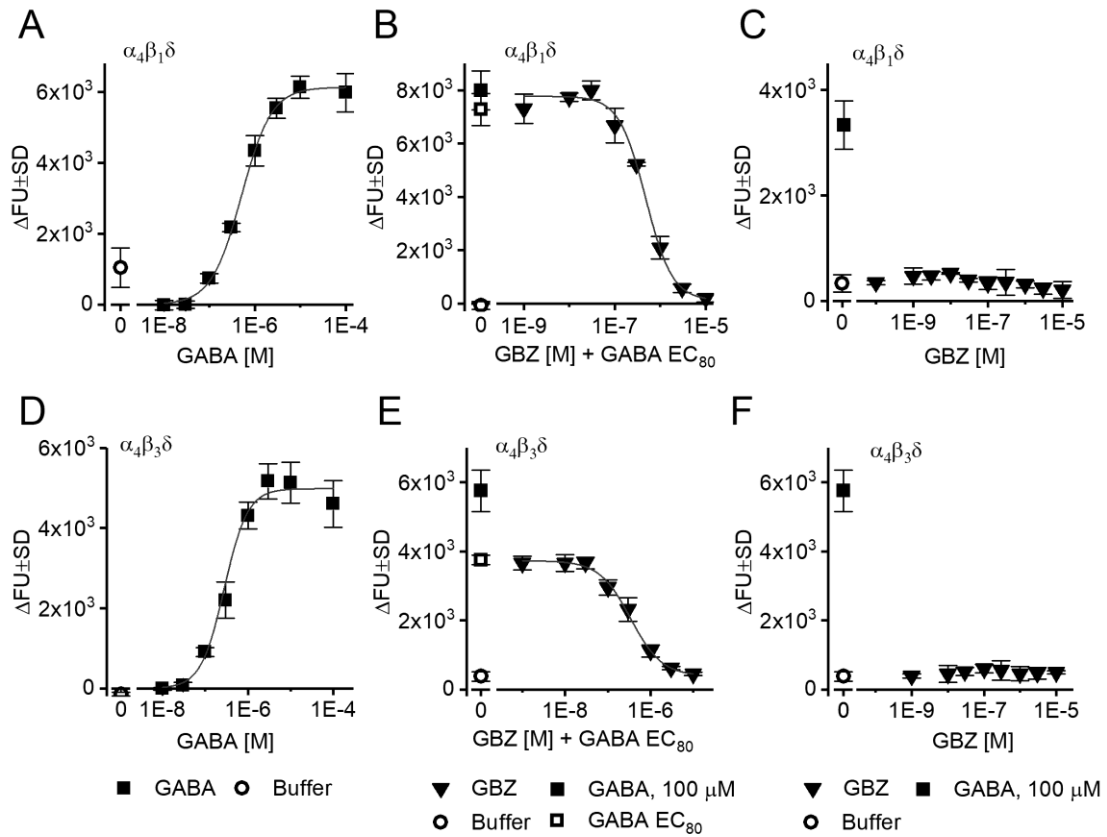

**Running title:** Constitutive current by GABA<sub>A</sub> receptors

**Figure 5**

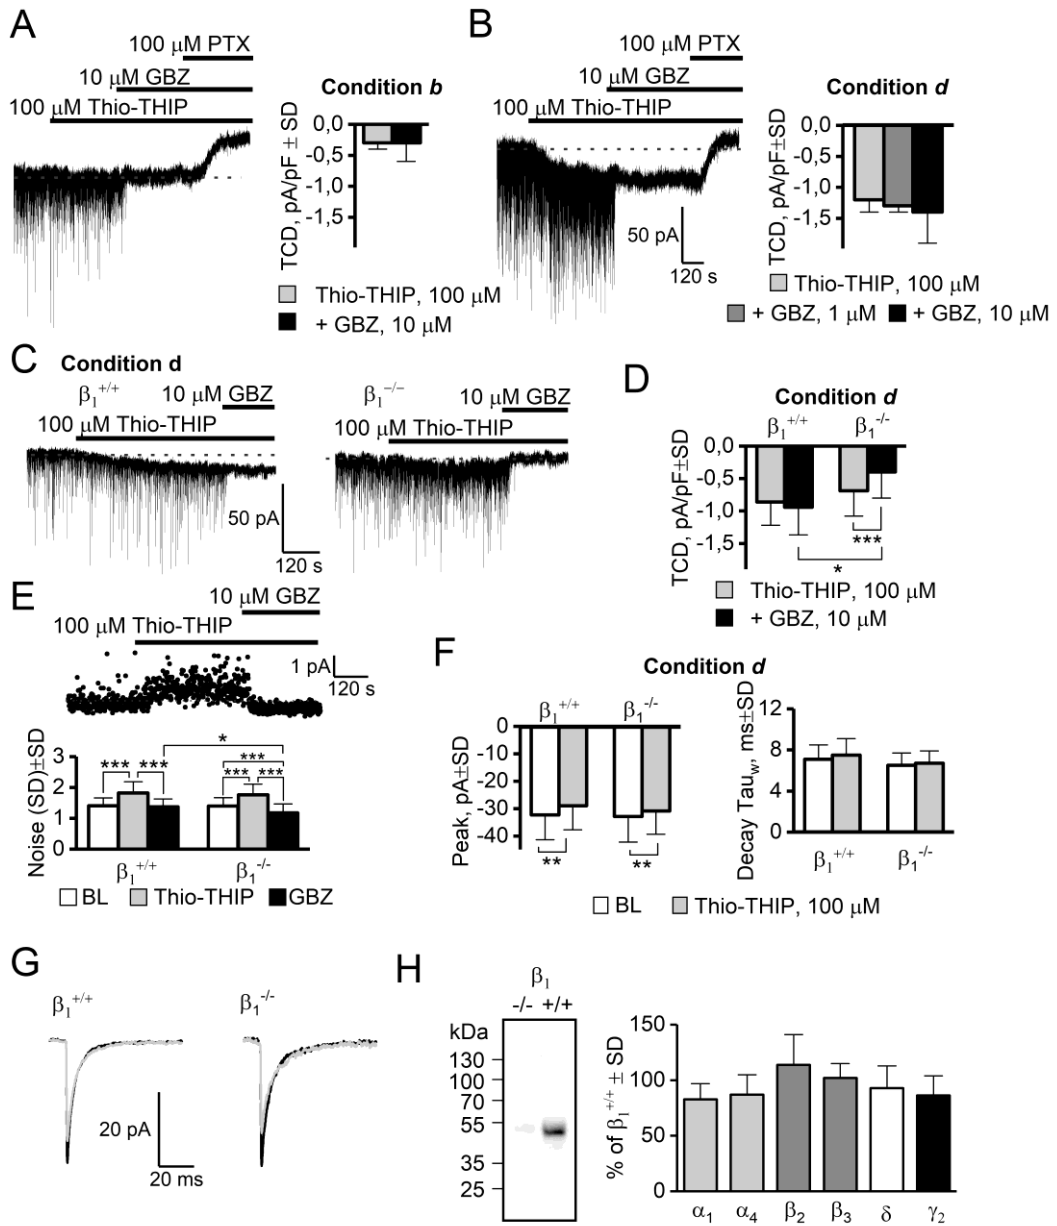

1

2

**Running title:** Constitutive current by GABA<sub>A</sub> receptors

**Figure 6**

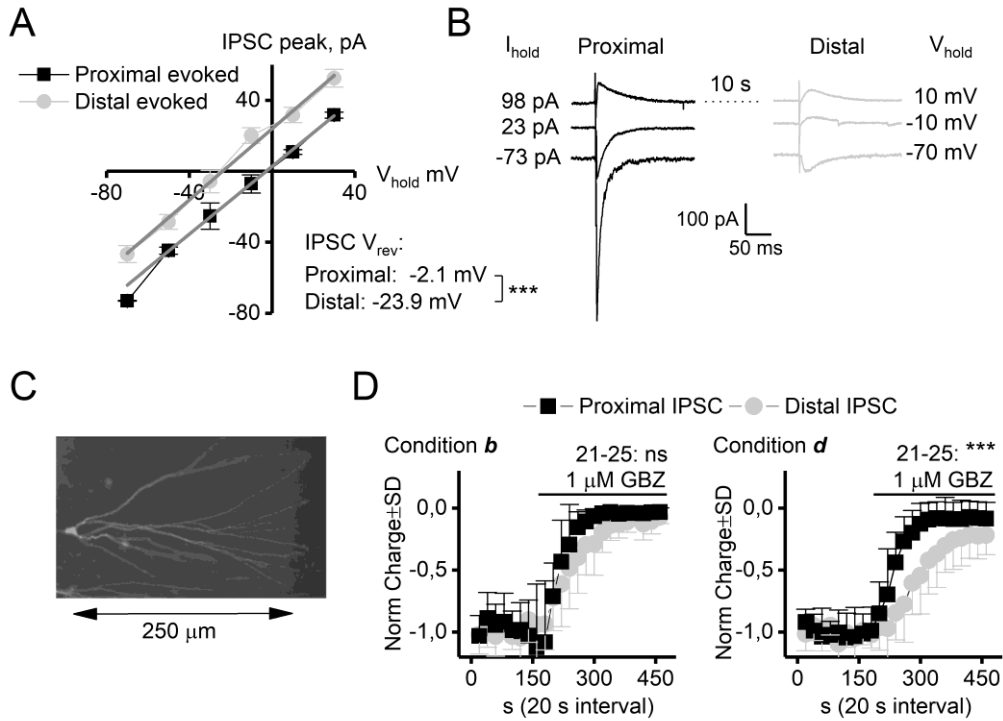

**Running title:** Constitutive current by GABA<sub>A</sub> receptors

1 Table 1

|                           | <b>Condition a</b>                                           | <b>Condition b</b>  | <b>Condition c</b> | <b>Condition d</b> |
|---------------------------|--------------------------------------------------------------|---------------------|--------------------|--------------------|
| Temperature and ICS       | 24 °C                                                        | 34 °C               | 34 °C, 50 μM EGTA, | 34 °C              |
|                           | 50 μM EGTA                                                   | 50 μM EGTA          | 10 μM PKC inh.     | 10 mM EGTA         |
| Drug                      | <b>Tonic Current Density (TCD), pA/pF ± SD (no of cells)</b> |                     |                    |                    |
| 20 μM BIC (fig.1)         | 0.0 ± 0.2 (12)                                               | 0.7 ± 0.2 *** (13)  | 0.1±0.4 (14)       | 0.1±0.3 (12)       |
| 100 μM Thio-THIP (fig. 2) | -1.2 ± 0.4 (12)                                              | -0.3 ± 0.3 *** (14) | -1.1 ± 0.3 (14)    | -1.2 ± 0.2 (12)    |
| + 100 μM PTX              | -0.1 ± 0.4                                                   | 0.9 ± 0.3 ***       | 0.1 ± 0.4          | -0.0 ± 0.2         |
| 2 μM THIP (fig. 2)        | -4.4 ± 0.7 (8)                                               | -2.4 ± 0.7 ** (8)   | -5.5 ± 1.0 (8)     | -4.9 ± 1.2 (10)    |
| + 100 μM PTX              | 0.1 ± 0.3                                                    | 0.8 ± 0.4 **        | -0.1 ± 0.3         | 0.1 ± 0.5          |
| 10 μM GBZ (fig. 3)        | -1.0 ± 0.3 (10)                                              | -0.2 ± 0.2 *** (12) | -1.1 ± 0.3 (12)    | -1.2 ± 0.3 (12)    |
| + 100 μM PTX              | 0.0 ± 0.4                                                    | 0.9 ± 0.3 ***       | 0.2 ± 0.3          | 0.2 ± 0.2          |

2

3 Table 1. Summary of the effect of BIC, Thio-THIP, THIP and GBZ on the TCD in adult male rat DGGCs  
4 recorded under four different conditions (*a-d*). Reported values are the tonic current density (TCD),  
5 calculated as the ratio of the difference in holding current between baseline and drug period over cell  
6 capacitance. Statistical difference is determined between compound effects in the different conditions by  
7 ANOVA followed by Bonferroni mean comparison. \*\*: P<0.01 \*\*\*: P<0.001.

8



**Running title:** Constitutive current by GABA<sub>A</sub> receptors

Figure 5-1 (extended data set)

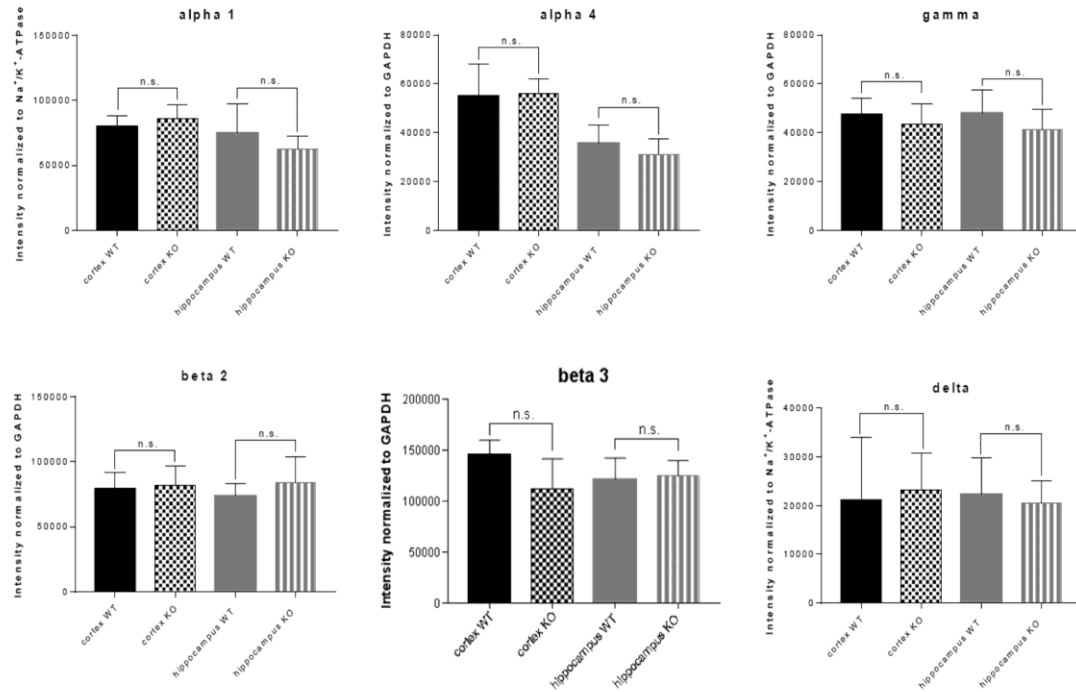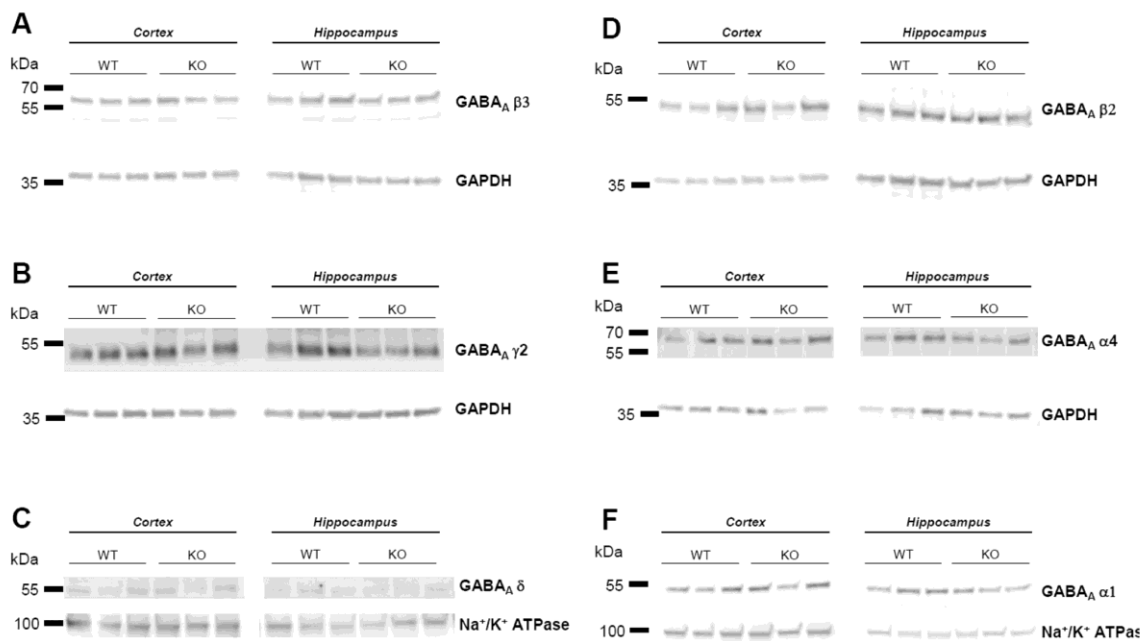

Source: http://biorxiv.org/content/10.1101/318543v1.full.pdf
